1 Absence of receptor guanylyl cyclase C enhances ileal damage and  
2 reduces cytokine and antimicrobial peptide production during oral  
3 *Salmonella* Typhimurium infection

4

5 Shamik Majumdar<sup>a</sup>, Vishwas Mishra<sup>b</sup>, Somesh Nandi<sup>b</sup>, Mudabir Abdullah<sup>b</sup>, Anaxee  
6 Barman<sup>b</sup>, Abinaya Raghavan<sup>a</sup>, Dipankar Nandi<sup>a</sup> and Sandhya S. Visweswariah<sup>b#</sup>

7

8 Department of Biochemistry<sup>a</sup>, Department of Molecular Reproduction, Development and  
9 Genetics<sup>b</sup>, Indian Institute of Science, Bangalore, India.

10

11 **Running Head:** Guanylyl cyclase C and *Salmonella* infection

12 Keywords: *Salmonella* Typhimurium; guanylyl cyclase C; guanylin; uroguanylin; thymic  
13 atrophy; goblet cell

14

15 # Address correspondence to Sandhya S. Visweswariah : sandhya@iisc.ac.in

16

17 SM, VM and SN contributed equally to this work

18

## 19 Abstract

20 Non-typhoidal *Salmonella* disease contributes towards significant morbidity and mortality  
21 across the world. Host factors including IFN- $\gamma$ , TNF- $\alpha$  and gut microbiota, significantly  
22 influence the outcome of *Salmonella* pathogenesis. However, the entire repertoire of host  
23 protective mechanisms contributing to *Salmonella* pathogenicity is not completely  
24 appreciated. Here, we have investigated the roles of receptor guanylyl cyclase C (GC-C) that  
25 is predominantly expressed in the intestine, and regulates intestinal cell proliferation and  
26 fluid-ion homeostasis. Mice deficient in GC-C (*Gucy2c*<sup>-/-</sup>) displayed accelerated mortality  
27 following infection via the oral route, in spite of possessing comparative systemic *Salmonella*  
28 infection burden. Survival following intra-peritoneal infection remained similar, indicating  
29 that GC-C offered protection via a gut-mediated response. Serum cortisol was higher in  
30 *Gucy2c*<sup>-/-</sup> mice, in comparison to wild type (*Gucy2c*<sup>+/+</sup>) mice, and an increase in infection-  
31 induced thymic atrophy, with loss in immature CD4<sup>+</sup>CD8<sup>+</sup> double positive thymocytes, was  
32 observed. Accelerated and enhanced damage in the ileum, including submucosal edema,  
33 epithelial cell damage, focal tufting and distortion of villus architecture, was seen in *Gucy2c*<sup>-/-</sup>  
34 mice, concomitant with a larger number of ileal tissue-associated bacteria. Transcription of  
35 key mediators in *Salmonella*-induced inflammation (IL-22/Reg3 $\beta$ ) were altered in *Gucy2c*<sup>-/-</sup>  
36 mice in comparison to *Gucy2c*<sup>+/+</sup> mice. A reduction in fecal Lactobacilli, which are  
37 protective against *Salmonella* infection, was observed in *Gucy2c*<sup>-/-</sup> mice. *Gucy2c*<sup>-/-</sup> mice co-  
38 housed with wild type mice continued to show reduced Lactobacilli and increased  
39 susceptibility to infection. Our study therefore suggests that receptor GC-C confers a survival  
40 advantage during gut-mediated *S. Typhimurium* pathogenesis, presumably by regulating  
41 *Salmonella*-effector mechanisms and maintaining a beneficial microbiome.

42

## 43 **Introduction**

44 Salmonellosis, the disease caused by the Gram-negative intracellular bacterium, *Salmonella*  
45 manifests in humans as typhoid, paratyphoid fever, non-typhoidal septicemia or  
46 gastroenteritis. Infection with *Salmonella* Typhi and Paratyphi serotypes are limited to  
47 humans, and cause the systemic disease, typhoid fever. Infections with other serotypes, called  
48 non-typhoidal *Salmonella*, result in enteritis and diarrhoea. *Salmonella* infects hosts orally via  
49 contaminated food or water (1). Mice infection models are useful not only to study factors in  
50 the pathogen that regulate disease progression, but also host factors that can modulate the  
51 severity of response to *Salmonella* infection (2). In susceptible mouse strains, such as those  
52 with defects in the gene encoding Slc11a1 (Nramp1), the bacterium traverses the distal ileum,  
53 and mice develop systemic infection after colonizing the Peyer's patches, liver and spleen  
54 (3).

55 Colonization of the mouse intestine is dependent on a number of factors, that include  
56 commensal microbiota, the gut mucosa and the gut-associated immune system. A number of  
57 host factors such as IFN- $\gamma$  (4), TNF- $\alpha$  (5, 6) and IL-22 modulate *Salmonella* pathogenesis (1).  
58 These factors regulate the production of chemokines that recruit inflammatory cells to the site  
59 of tissue damage and infection (7). In addition, it is conceivable that modulators of intestinal  
60 epithelial cell function may also provide mechanisms to modulate *Salmonella* pathogenesis,  
61 since the first point of contact for the pathogen is the epithelial cells that line the  
62 gastrointestinal tract (8).

63 Receptor guanylyl cyclase C (GC-C) is a transmembrane receptor predominantly expressed  
64 on the apical membrane of the intestinal enterocytes. It serves as a receptor for the  
65 endogenous hormones, guanylin and uroguanylin (9, 10). Activation of GC-C upon ligand-  
66 binding results in production of cGMP, which leads to protein kinase G II-dependent

67 activation of the cystic fibrosis transmembrane conductance regulator (CFTR) and inhibition  
68 of NHE3, the sodium–hydrogen exchanger 3. Activation of CFTR causes efflux of chloride  
69 and CFTR-dependent bicarbonate secretion into the lumen and inhibition of sodium  
70 absorption by NHE3, thus resulting in an osmotic gradient, leading to fluid accumulation in  
71 the lumen. Hence, the major role of GC-C is in maintenance of fluid-ion homeostasis in the  
72 gut (11). GC-C also serves as the receptor for the heat-stable enterotoxin (ST), the causative  
73 agent of enterotoxigenic *Escherichia coli* (ETEC)-mediated diarrhoea in children and  
74 traveller’s diarrhoea (12). Mice lacking GC-C are resistant to heat-stable enterotoxin-induced  
75 fluid accumulation (13), and are reported to display higher susceptibility to dextran sodium  
76 sulphate-induced colitis (14). Previously, we have demonstrated that mice lacking GC-C  
77 show increased N-Methyl-N-nitrosourea-induced aberrant crypt foci (15), indicating a role  
78 for GC-C in maintaining intestinal cell proliferation.

79 Mice deficient in GC-C (i.e., *Gucy2c*<sup>-/-</sup>) mice have been reported to possess a compromised  
80 gut epithelial barrier which was attributed to the lower expression of tight junction proteins  
81 such as occludin, claudin 2 and claudin 4 (14). *Citrobacter rodentium* (*C. rodentium*), an  
82 enteric Gram-negative bacterium causes self-limiting infection in mice, and *Gucy2c*<sup>-/-</sup> mice  
83 are reported to be more susceptible to infection by them (16). Here, we have studied the role  
84 of GC-C as a host factor during *Salmonella*-mediated pathogenesis in mice. We find that in  
85 contrast to expectations that a compromised gut barrier would lead to enhanced systemic  
86 infection, the increased susceptibility of *Gucy2c*<sup>-/-</sup> mice to oral infection with *Salmonella*  
87 Typhimurium (*S. Typhimurium*; St) was a result of increased bacterial load in the ileum,  
88 altered cytokine production, increased ileal tissue damage, and coupled to an altered fecal  
89 microbiome.

## 90 **Results**

### 91 **Mice lacking GC-C display accelerated mortality during oral *S. Typhimurium* infection**

92 We infected C57BL/6 wild type (*Gucy2c*<sup>+/+</sup>) and *Gucy2c*<sup>-/-</sup> mice orally with *S. Typhimurium*  
93 and monitored their survival. We chose not to treat the mice with streptomycin (17), since we  
94 were interested in an acute model of *S. Typhimurium* infection, without altering the existing  
95 microbiota in these mice (18). Surprisingly, survival experiments revealed an increased  
96 susceptibility of *Gucy2c*<sup>-/-</sup> mice to oral, but not intra-peritoneal, infection with *S.*  
97 *Typhimurium* (Fig. 1a), indicating a role for GC-C in offering protection to gut-associated  
98 infection. Median survival for *Gucy2c*<sup>+/+</sup> mice following oral infection was 112 h while it  
99 was 80 h for *Gucy2c*<sup>-/-</sup> mice, and the difference was statistically significant ( $p = 0.006$ ).  
100 Interestingly, fecal excretion of bacteria was similar in *Gucy2c*<sup>+/+</sup> and *Gucy2c*<sup>-/-</sup> mice at early  
101 stages of infection, as was the bacterial burden in organs such as the spleen, Peyer's patches  
102 and liver on day 3 post infection (Fig. 1b, c). In agreement with earlier observations (19),  
103 poor survival on *Salmonella* infection was correlated with a significant reduction in body  
104 weight of *Gucy2c*<sup>-/-</sup> mice on day 3 (Fig. 1d).

105 Next, we monitored pro-inflammatory cytokines in the sera 3 days post oral infection, to  
106 determine whether enhanced immune cell activation and inflammation was responsible for  
107 the poor survival of *Gucy2c*<sup>-/-</sup> mice. As shown in Fig. 1e, while there was a tendency for an  
108 increase in serum TNF- $\alpha$  and IL-6 levels on infection, the increase was not statistically  
109 significant. IFN- $\gamma$  levels were elevated on infection in both strains of mice, but there was no  
110 difference between *Gucy2c*<sup>+/+</sup> and *Gucy2c*<sup>-/-</sup> mice. Therefore, we conclude that an increase in  
111 systemic infection or inflammation was not the cause for early death of *Gucy2c*<sup>-/-</sup> mice.

### 112 **Enhanced infection-induced thymic atrophy is observed in *Gucy2c*<sup>-/-</sup> mice**

113 We have previously reported that serum cortisol, a marker of general stress experienced by  
114 the animal, is increased on *Salmonella* infection and contributes towards *S. Typhimurium*-  
115 induced thymic atrophy in mice (20, 21). We monitored cortisol levels and observed an

116 increase in serum cortisol on infection. However, at 48 h, *Gucy2c*<sup>-/-</sup> mice showed higher  
117 levels of circulating cortisol than that seen in *Gucy2c*<sup>+/+</sup> mice (Fig. 2a). Thymic atrophy was  
118 observed in both *Gucy2c*<sup>+/+</sup> and *Gucy2c*<sup>-/-</sup> mice (Fig. 2b, c), but was more pronounced in  
119 *Gucy2c*<sup>-/-</sup> mice, both at 48 and 96 h post infection (Fig. 2b). CD4 and CD8 cell surface  
120 staining of isolated thymocytes revealed an increased depletion of CD4<sup>+</sup>CD8<sup>+</sup> thymocytes in  
121 *Gucy2c*<sup>-/-</sup> mice post 96 hrs of infection (Fig. 2c).

### 122 **Increased epithelial damage in the small intestine is observed in *Gucy2c*<sup>-/-</sup> mice**

123 Results so far suggest that the protective effects of GC-C are mediated predominantly at the  
124 level of the gastrointestinal tract, and could be initiated early during infection, thereby  
125 resulting in significant weight loss and earlier death in *Gucy2c*<sup>+/+</sup> mice. We therefore  
126 monitored bacterial load in various regions of the gut following infection in both *Gucy2c*<sup>+/+</sup>  
127 and *Gucy2c*<sup>-/-</sup> mice. Colony forming units (CFU) were enumerated on day 3 following  
128 infection, at which time a few *Gucy2c*<sup>-/-</sup> mice had already succumbed. As shown in Fig. 3a,  
129 while bacterial loads in the cecum and colon were similar in both strains of mice, and an  
130 almost 2-log order increase in bacteria was seen in the distal ileum.

131 We measured ileal damage and goblet cell number on day 3, using Periodic Acid Schiff  
132 (PAS) staining following paraformaldehyde fixation. Examination of small intestinal sections  
133 showed marked histopathological differences between infected *Gucy2c*<sup>+/+</sup> and *Gucy2c*<sup>-/-</sup> mice.  
134 Infection resulted in more severe inflammation in the small intestine of *Gucy2c*<sup>-/-</sup> mice, with  
135 increased focal tufting and distortion of the crypt-villus architecture by day 4 (Fig. 3b). A  
136 larger number of dead cells were also observed in the lumen of the ileum in *Gucy2c*<sup>-/-</sup> mice by  
137 day 4 post-infection.

138 PAS staining revealed a reduced number of goblet cells in uninfected *Gucy2c*<sup>-/-</sup> mice (Fig.  
139 3c). Goblet cell numbers reduced in *Gucy2c*<sup>+/+</sup> on infection, as has been reported earlier

140 (17), but were increased in *Gucy2c*<sup>-/-</sup> mice. Also noteworthy is the intense staining of Paneth  
141 cells in the crypts of both *Gucy2c*<sup>+/+</sup> and *Gucy2c*<sup>-/-</sup> mice following infection.

142 **S. Typhimurium infection downregulates the transcription of GC-C and its ligands,**  
143 **guanylin and uroguanylin**

144 Results so far indicate that signaling via GC-C protects the host during *Salmonella* infection,  
145 by reducing the extent of tissue damage and colonization in the ileum. We therefore asked if  
146 infection alters the expression of genes in the GC-C signaling pathway, which could be a  
147 strategy used by *Salmonella* to increase its virulence in the host. We performed quantitative  
148 real-time PCR analysis of cDNA prepared from the distal ileum of *Gucy2c*<sup>+/+</sup> mice on day 3  
149 following oral infection and observed that the transcript levels of GC-C were significantly  
150 reduced on infection (Fig. 4). The distal ileum may be a region where both guanylin and  
151 uroguanylin are expressed to comparable levels (22), and interestingly, transcript levels of  
152 both the ligands were reduced on infection in both *Gucy2c*<sup>+/+</sup> and *Gucy2c*<sup>-/-</sup> mice (Fig. 4).  
153 Other genes downstream of GC-C did not show a change in expression levels (*Cftr*, *PkgII* and  
154 *Pde5*) on infection, while *Nhe3* transcripts were upregulated in both *Gucy2c*<sup>+/+</sup> and *Gucy2c*<sup>-/-</sup>  
155 infected mice. Activation of GC-C results in cGMP-dependent phosphorylation of NHE3 that  
156 inhibits this Na<sup>+</sup>/H<sup>+</sup> exchanger (11, 23). Therefore, the downregulation of guanylin and  
157 uroguanylin transcripts, coupled with increased expression of *Nhe3* would enhance Na<sup>+</sup>  
158 uptake by the epithelial cells, possibly counteracting loss of this ion during *Salmonella*-  
159 induced diarrhea in humans.

160 **GC-C regulates transcription of cytokines and effectors during *Salmonella* infection**

161 Intestinal inflammation following *Salmonella* infection is a consequence of upregulation of  
162 pro-inflammatory genes including *TNF-α*, *Il-1β*, *Il-22*, *Il-6*, *Ifn-γ* (24) and genes expressing  
163 the C-type lectins *Reg3γ* and *Reg3β* (1). Transcripts of most cytokines were upregulated to

164 similar extents in both *Gucy2c*<sup>+/+</sup> and *Gucy2c*<sup>-/-</sup> mice following infection (Fig. 5). Transcript  
165 levels of only a few genes (*Il-22*, *Cxcl15* and *Reg3β* ; see green bars in Fig. 5) differed  
166 statistically between *Gucy2c*<sup>+/+</sup> and *Gucy2c*<sup>-/-</sup> mice following infection. While *lipocalin 2*  
167 transcripts were significantly increased in *Gucy2c*<sup>-/-</sup> mice, there was no statistical difference  
168 between levels in wild type and *Gucy2c*<sup>-/-</sup> mice following infection. In summary, this  
169 indicates a role for GC-C signaling in modulating specific arms of the *Salmonella*-induced  
170 immune response.

171 **Reduced *Lactobacilli* in *Gucy2c*<sup>-/-</sup> mice may contribute to initial susceptibility of mice to**  
172 ***Salmonella* infection**

173 The gut microbiota is known to influence infection progression by *Salmonella* (17, 18, 25,  
174 26). We therefore monitored the major Phyla of bacteria present in the mouse gut, and also  
175 *Lactobacillus sp* which has been reported to protect from *Salmonella* infection (25–28). We  
176 prepared genomic DNA from stool samples from both *Gucy2c*<sup>+/+</sup> and *Gucy2c*<sup>-/-</sup> mice, and  
177 performed real-time PCR using universal and Phyla specific primers for the 16S rRNA genes.  
178 As shown in Fig. 6, while the major Phyla (Bacteroidetes and Firmicutes) were largely  
179 unchanged in both strains of mice, *Lactobacillus sp* were significantly reduced. Since  
180 *Lactobacilli* have been reported to attenuate the severity of salmonellosis in mice (25), we  
181 propose that the initial environment of the gut of *Gucy2c*<sup>-/-</sup> mice could have also contributed  
182 to initial infection and uptake of *S. Typhimurium*, culminating in the increased susceptibility  
183 of *Gucy2c*<sup>-/-</sup> mice to infection.

184 To ensure that alterations in the microbiome in *Gucy2c*<sup>-/-</sup> mice were directly a consequence of  
185 the absence of GC-C in the gut, we co-housed *Gucy2c*<sup>-/-</sup> mice at the time of weaning with  
186 adult wild type mice for 4 weeks. We then monitored major Phyla in the feces collected from  
187 co-housed mice. We continued to observe a similar composition of microbiota after co-



188 housing, including the lower levels of *Lactobacilli* in *Gucy2c*<sup>-/-</sup> mice (Fig. 6a). We infected  
189 these co-housed *Gucy2c*<sup>-/-</sup> mice along with age-matched wild type mice, housed both strains  
190 of mice together in multiple cages following infection, and monitored survival. In agreement  
191 with earlier results, we saw dramatically poorer survival of *Gucy2c*<sup>-/-</sup> mice that were co-  
192 housed with infected *Gucy2c*<sup>+/+</sup> mice following infection (Fig. 6a). Similar fecal bacterial  
193 loads (Fig. 6b) were observed in all mice, but *Gucy2c*<sup>-/-</sup> mice showed a marked reduction in  
194 body weight by day 3. Therefore, these co-housing experiments suggest that susceptibility of  
195 *Gucy2c*<sup>-/-</sup> mice to *Salmonella* infection is caused by genetically-determined changes in gut  
196 response and microbiome composition.

## 197 **Discussion**

198 GC-C-mediated cGMP pathways are essential regulators of intestinal homeostasis, including  
199 fluid-ion secretion and cell proliferation(23). The role of GC-C in diarrhea caused by  
200 enterotoxigenic *E. coli* that produce heat-stable enterotoxins is well established, since GC-C  
201 serves as the receptor for the toxin (11). However, the roles of GC-C, if any, during severe  
202 enteric infections, have not been investigated. Here we have utilized the *S. Typhimurium*  
203 infection model in mice which results in an acute, progressive and lethal infection, to study  
204 the contribution of GC-C during *Salmonella* pathogenesis. Our results show that GC-C  
205 provides protection to oral *S. Typhimurium* infection, and absence of GC-C was correlated  
206 with reduced ileal damage and changes in the levels of some cytokines and antimicrobial  
207 peptides (AMPs) (1, 24) (Fig. 7). Interestingly, the rapid mortality seen in *Gucy2c*<sup>-/-</sup> mice was  
208 not dependent on increased systemic infection, since bacteria colonized extra-intestinal tissue  
209 to equivalent extents in both *Gucy2c*<sup>+/+</sup> and *Gucy2c*<sup>-/-</sup> mice.

210 Glucocorticoids (GCs) are steroid hormones which are secreted by the adrenal glands and  
211 possess immunosuppressive properties. GCs are an indicator of stress (29) and are

212 upregulated during *S. Typhimurium* infection in mice (21). At 48 h post infection, serum  
213 cortisol levels in *Gucy2c*<sup>-/-</sup> mice were significantly higher than that seen in *Gucy2c*<sup>+/+</sup> mice.  
214 Thymic atrophy accompanies numerous infections and GCs contribute towards depletion of  
215 the developing CD4<sup>+</sup>CD8<sup>+</sup> immature thymocytes during infections by pathogens such as  
216 *Listeria monocytogenes*, type A *Francisella tularensis*, *Trypanosoma cruzi* and *S.*  
217 *Typhimurium* (20, 21). Since *Gucy2c*<sup>-/-</sup> mice displayed early elevated levels of serum cortisol  
218 (Fig. 2a), infection-induced thymic atrophy in *Gucy2c*<sup>-/-</sup> mice was indeed observed to be  
219 significantly higher than in *Gucy2c*<sup>+/+</sup> mice.

220 Higher circulating cortisol could be attributed to enhanced colonization and inflammation in  
221 *Gucy2c*<sup>-/-</sup> mice, as evidenced by histopathology of the ileum. *S. Typhimurium* infection  
222 results in inflammation of the cecum and colon, with lower inflammation seen in the ileum of  
223 mice (30). Germ-free mice display higher ileal load than specific-pathogen-free mice when  
224 administered with similar doses of *S. Typhimurium* (31). The higher colonization in the ileum  
225 of *Gucy2c*<sup>-/-</sup> mice may be due to higher translocation or invasion of *Salmonella* in the gut of  
226 these mice. Interestingly during Crohn's disease, selective inflammation in the terminal ileum  
227 is observed (32) . In addition, the standard therapy for inflammatory bowel disease (IBD) is  
228 administration of corticosteroids, which facilitate immunosuppression (33). The elevated  
229 levels of cortisol observed in *Gucy2c*<sup>-/-</sup> mice during infection (Fig. 2a) might be a  
230 compensatory mechanism to reduce inflammation of the ileum.

231 *Salmonella* pathogenesis results in altered gene expression profile in the intestine (1). The  
232 transcript levels of GC-C and its endogenous ligands, guanylin and uroguanylin were  
233 downregulated upon infection in the ileum (Fig. 4). However, the transcript levels of other  
234 downstream effectors of the GC-C pathway such as *PkgII*, *Cftr* and *Pde5* were not  
235 differentially modulated post infection. NHE3 is an abundantly expressed Na<sup>+</sup>/H<sup>+</sup> exchanger  
236 in the intestine (11, 34). There was a significant increase in the expression of NHE3 upon

237 infection, which occurred independently of the presence of GC-C. The significant increase in  
238 NHE3 transcript levels is counterintuitive, since there are reports of downregulation of NHE3  
239 by pro-inflammatory cytokines such as IFN- $\gamma$  and TNF- $\alpha$ , during EPEC infection and  
240 inflammatory bowel disease (34). Mechanisms that lead to transcriptional regulation of  
241 NHE3 upon *Salmonella* infection are unknown and warrant further investigation.

242 There are only two reports of disruption of GC-C signaling at both receptor and ligand levels,  
243 as we see here on *Salmonella* infection (Fig. 4). In ulcerative colitis patients, a severity-  
244 dependent downregulation in expression of GC-C, guanylin and uroguanylin in the colonic  
245 mucosa, is observed (35). GC-C and its ligands are also downregulated in inflamed colonic  
246 IBD mucosa of patients, (36) and in 2,4,6-trinitrobenzene sulphonic acid-induced colitis in  
247 rats (37). The significant downregulation of GC-C and its ligands upon *Salmonella* infection  
248 could therefore occur as a consequence of altered composition of the tissue following the  
249 inflammation induced by infection.

250 *Salmonella* infection and invasion of the intestine induce inflammatory responses including  
251 upregulation of pro-inflammatory cytokines (24). The induction of TNF- $\alpha$  in the  
252 gastrointestinal tract during *Salmonella* infection is well known (5, 6). Low amounts of TNF-  
253  $\alpha$  confer protection to mice towards *Salmonella* infection (38), while administration of higher  
254 doses causes extensive histopathological damage, organ dysfunction and death within  
255 minutes to hours due to respiratory arrest (39, 40). Following infection, there was no  
256 statistical difference between transcript levels of TNF- $\alpha$  in the ileum in wild type and  
257 *Gucy2c*<sup>-/-</sup> mice. TNF- $\alpha$  mediates the depletion of goblet cells during *S. Typhimurium*  
258 infection in mice, as pre-treatment with anti-TNF $\alpha$  antibody restores the goblet cell numbers  
259 and mucin profiles (6). We however see an increase in goblet cell numbers on infection in the  
260 small intestine in *Gucy2c*<sup>-/-</sup> mice, suggesting a novel means of regulating goblet cell number  
261 by GC-C.

262 A critical arm of the antimicrobial innate immune response is the production of epithelial  
263 cell-derived AMPs. This antimicrobial response is mediated via the IL-22 cytokine, which  
264 induces the expression of AMPs in the intestinal epithelial cells (1). IL-22 is produced by  
265 leukocytes such as T helper type 17 (T<sub>H</sub>17) cells in response to IL-23 produced by infected  
266 dendritic cells and macrophages (41) and/or IL-6 produced by intestinal epithelial cells (42).  
267 AMPs induced by IL-22 include REG3 $\beta$ , REG3 $\gamma$ , lipocalin 2 and calprotectin. REG3 $\beta$  and  
268 REG3 $\gamma$  are bactericidal C-type lectins and eliminate Gram-positive bacteria (1, 43). Lipocalin  
269 2 and calprotectin do not kill bacteria directly but starve them of metals which are essential  
270 for their growth (1). This AMP response has been demonstrated to impart a growth advantage  
271 to Gram-negative pathogens such as *Salmonella* over commensal bacteria (44). *Reg3 $\gamma$ <sup>-/-</sup>* and  
272 *Reg3 $\beta$ <sup>-/-</sup>* mice are more susceptible to *Salmonella enteritidis* infection, implying a protective  
273 role of these AMPs against this pathogen (45, 46). The lower infection-induced expression of  
274 IL-22 in *Gucy2c<sup>-/-</sup>* mice (Fig. 5) may affect the induction of AMPs in the epithelial cells, and  
275 indeed, the transcript levels of Reg3 $\beta$  in *Gucy2c<sup>-/-</sup>* mice were found to be significantly lower  
276 upon infection than in *Gucy2c<sup>+/+</sup>* mice. This may also partly account for the susceptibility of  
277 these mice to *Salmonella* infection.

278 Innate lymphoid cells are potent producers of IL-22 after intestinal injury. Importantly, IL-  
279 22 has been shown to induce intestinal epithelial regeneration, by increasing proliferation of  
280 intestinal stem cells (47). *Gucy2c<sup>-/-</sup>* mice showed a reduction in *Il-22* transcripts on infection  
281 (Fig. 6). It is possible that the increased intestinal damage seen in *Gucy2c<sup>-/-</sup>* mice could be a  
282 consequence of reduced proliferation of stem cells and therefore replenishment of epithelial  
283 cells.

284 The gastrointestinal tract is a rich source of aryl hydrocarbon receptor (AhR) ligands (48).  
285 Ahr protects the gut upon challenge with pathogenic bacteria (49) by increasing IL-22  
286 expression. Thus, AhR-deficient mice succumb to *Citrobacter rodentium* infection, and

287 ectopic expression of IL-22 protected mice from this early mortality (49). It would therefore  
288 be of interest to monitor AhR expression in the gut of *Gucy2c*<sup>-/-</sup> mice and determine whether  
289 this contributes to reduced *Il-22* transcripts in infected mice.

290 The gut microbiota is a critical determinant for susceptibility to various infectious pathogens  
291 (50) including *S. Typhimurium* (17, 18, 25, 26). The gut microbiota can either promote  
292 resistance to colonization of pathogens or assist and enhance its virulence (50). In our study,  
293 there were no significant differences in the abundance of the major phyla (i.e., Bacterioidetes,  
294 Firmicutes, Actinobacteria and Proteobacteria) in *Gucy2c*<sup>+/+</sup> and *Gucy2c*<sup>-/-</sup> mice (Fig. 6a).  
295 However, we observed a significant decrease in the abundance of *Lactobacillus* in *Gucy2c*<sup>-/-</sup>  
296 mice, as has been reported earlier (16). We observed this decrease even following co-  
297 housing of *Gucy2c*<sup>-/-</sup> mice with wild type mice. (Fig. 6). Different species and isolates of  
298 *Lactobacillus* have been shown to exert antagonistic activity on *Salmonella* invasion and  
299 colonization (25–28). For example, *Lactobacillus acidophilus* inhibits adhesion, invasion and  
300 dissemination of attenuated *S. Typhimurium* in BALB/c mice (25). In vitro studies in human  
301 intestinal Caco-2 cells reveal that *Lactobacillus acidophilus* attenuates *Salmonella*-induced  
302 intestinal inflammation via transforming growth factor  $\beta$ /MIR21 signaling pathway (26). The  
303 lower abundance of specific *Lactobacillus sp.* might inherently predispose *Gucy2c*<sup>-/-</sup> mice to  
304 *Salmonella* infection, and contribute to the higher degree of translocation and epithelial  
305 damage in the ileum.

306 Microbiota dysbiosis has been reported in mice null for genes involved in fluid-ion  
307 homeostasis of the gut (51, 52). It is possible that GC-C enhances growth and colonization of  
308 *Lactobacillus sp.* in the gut by providing and maintaining the luminal pH and/or electrolyte  
309 distribution and balance. Certain species of *Lactobacillus* have been shown to produce  
310 indole-3-aldehyde that is an Ahr ligand. (49). Metagenomic analysis of the microbiome of

311 *Gucy2c*<sup>-/-</sup> mice may reveal another mechanism by with reduced levels of specific *Lactobacilli*  
312 could affect IL-22 production in an AhR-dependent manner.

313 In summary, we have studied the role of GC-C during *S. Typhimurium* infection in mice and  
314 have identified GC-C as a crucial host factor that provides protection against gut-mediated  
315 infection by *S. Typhimurium*. Our results, summarized in Fig. 7, indicate that *Salmonella*  
316 infection results in downregulation of GC-C ligands and a modest but significant  
317 downregulation of GC-C. Absence of GC-C in the gut modulates the innate immune response  
318 to *Salmonella* and cytokine production, possibly affecting neutrophil migration and/or stem  
319 cell proliferation in the distal ileum. We speculate, therefore, that administration of GC-C  
320 ligand analogs may alleviate *Salmonella*-mediated symptoms and pathology. Linaclotide is a  
321 FDA approved oral GC-C ligand and is used in treatment of constipation and chronic  
322 idiopathic constipation. This drug is effective against visceral pain associated with  
323 constipation predominant inflammatory bowel syndrome (C-IBS) (53). Therefore,  
324 paradoxically, a target for a bacterial toxin that causes diarrhoea may act as a therapeutic  
325 target for treatment and alleviation of *Salmonella*-mediated intestinal symptoms and  
326 pathology.

## 327 **Materials and Methods**

### 328 **Bacterial cultures**

329 The *S. Typhimurium* NCTC 12023 strain was used for mice infections. A single isolated  
330 colony of *S. Typhimurium* grown on a *Salmonella-Shigella* (SS) agar plate was used to grow  
331 culture the pre-inoculum. The overnight pre-inoculum was used at 0.2% in 50 mL of Luria  
332 broth and cultured for 3 hours at 37°C and 160 rpm to obtain a log phase culture. The  
333 bacterial culture was washed and resuspended in sterile phosphate-buffered saline (PBS) and  
334 used for infection (21).

335 **Mice**

336 *Gucy2c*<sup>-/-</sup> obtained from the Jackson laboratory, were backcrossed with C57BL/6 mice for  
337 more than 10 generations with multiple founder wild type mice. *Gucy2c*<sup>+/+</sup> and *Gucy2c*<sup>-/-</sup>  
338 mice were bred in the same vivarium, as described previously (15), and housed in a clean air  
339 facility in multiple cages, separated based on sex and strain. Temperature (22 ± 2°C) and  
340 humidity (55 ± 10%) were maintained with a 12 h light/dark cycle. Mice had access to  
341 laboratory chow and water *ad libitum*. Chow was procured from Rayans Biotech, Hyderabad,  
342 India, and contained ~ 24% protein, 6% oil, and 3% dietary fiber. Mice aged 6-8 weeks of  
343 either sex, weighing 18-30 grams were used for experiments, and following infection housed  
344 in multiple cages to rule out cage-dependent effects.

345 In some experiments, *Gucy2c*<sup>-/-</sup> mice, at the time of weaning, were co-housed with adult wild  
346 type mice for 4 weeks in multiple cages. Feces were collected from co-housed *Gucy2c*<sup>-/-</sup>  
347 mice, and mice then placed in a cage along with the wild type mice to be used for infection.  
348 Three days later, mice were used for infection.

349 **Ethics statement**

350 The experiments were performed in agreement with the Control and Supervision rules, 1998  
351 of Ministry of Environment and Forest Act (Government of India) and the Institutional  
352 Animal Ethics Committee of the Indian Institute of Science (IISc). *Gucy2c*<sup>+/+</sup> and *Gucy2c*<sup>-/-</sup>  
353 mice were bred and maintained at the Central Animal Facility of IISc (Registration number:  
354 48/1999/CPCSEA, dated 1/3/1999). The experimental protocols were approved by the  
355 ‘Committee for Purpose and Control and Supervision of Experiments on Animals’  
356 (CPCSEA), permit number: CAF/Ethics/216/2011. The details of the national guidelines can  
357 be found on: [http://envfor.nic.in/division/committee-purpose-control-and-supervision-](http://envfor.nic.in/division/committee-purpose-control-and-supervision-experiments-animals-cpcsea)  
358 [experiments-animals-cpcsea](http://envfor.nic.in/division/committee-purpose-control-and-supervision-experiments-animals-cpcsea) (21).

## 359 **Mice infection**

360 The mice were infected with *S. Typhimurium* either orally or intra-peritoneally and survival  
361 was monitored. For infections via the intra-peritoneal route, ~750 bacteria/mouse were  
362 administered, while for oral infection,  $\sim 10^8$  bacteria/mouse were used. The bacterial culture  
363 was resuspended in PBS and 0.5 mL was administered either intraperitoneally or by oral  
364 gavage.

365 Fresh fecal samples were collected following infection, weighed, homogenized in PBS and  
366 the appropriate dilutions were plated on SS agar plates. For quantification of CFU burden in  
367 organs, the mice were sacrificed at the indicated time points and the organs were harvested,  
368 weighed and homogenized in PBS. Appropriate dilutions were plated on SS agar plates (20).

## 369 **Serum cytokines and cortisol estimation**

370 Serum TNF- $\alpha$ , IL-6 and IFN- $\gamma$  were quantified using ELISA kits (eBioscience, USA), while  
371 serum cortisol amounts were measured using the AccuBind ELISA kit (Monobind Inc., USA)  
372 according to the manufacturer's instructions (21).

## 373 **Flow cytometric analysis of thymocytes**

374 On indicated days, uninfected and infected mice were sacrificed, thymi dissected and washed  
375 in PBS. The organs were disrupted with a pair of forceps and the cell suspensions were  
376 passed through a fine wire mesh to obtain a single cell suspension, and viability of the cells  
377 was estimated by Trypan blue exclusion assay using a haemocytometer. Thymocytes were  
378 stained for cell surface expression of CD4 and CD8 to estimate the major cell subpopulations.  
379 Anti-mouse CD4-APC (17-0041-83) and anti-mouse CD8-PE (12-0081-85) were purchased  
380 from eBioscience. Cells were incubated with fluorochrome-conjugated antibodies at 4°C for  
381 45 mins. Subsequently, the cells were washed twice with PBS and fixed in 0.5%



382 paraformaldehyde. The cells were acquired on the FACSVerse™ flow cytometer (BD  
383 Bioscience USA). Baseline instrument application and compensation settings were set using  
384 unstained and single stained samples respectively. Single events were gated on the basis of  
385 forward scatter-area versus forward scatter-height, while live events were gated on the basis  
386 of forward scatter-area versus side scatter-area. These selections were considered to  
387 exclusively analyse single live events. CD4 versus CD8 density plots were constructed for  
388 thymocytes and the major cell populations were quantified. WinMDI and FlowJo (9.8.5)  
389 software were used to plot and analyse the results (21).

### 390 **Histological analysis**

391 Histological analysis was performed on ileal sections, which were fixed in 4%  
392 paraformaldehyde in PBS (pH 6.9) and Periodic Acid Schiff (PAS) staining was performed  
393 (48). Briefly, following fixation, sections were dehydrated by serial immersion in increasing  
394 concentrations of ethanol and finally in paraffin. The tissues were embedded in paraffin and 4  
395 µm sections were obtained using a microtome (Leica Biosystems, Germany). The sections  
396 were dewaxed and rehydrated by serial immersion in decreasing concentrations of ethanol.  
397 Sections were stained with PAS (Avinash Chemicals, Bangalore, India) following the  
398 manufacturer's instructions. The nuclei were subsequently stained with hematoxylin (Sigma-  
399 Aldrich, USA). Sections were then dehydrated and mounted. The sections were observed  
400 using an Olympus XI81 microscope (Olympus Corporation Tokyo, Japan).

### 401 **RNA isolation and quantitative real time PCR analysis**

402 A portion of the distal ileum was isolated and stored in TRI reagent (RNAiso Plus, TaKaRa).  
403 The RNA was isolated using the QIAGEN RNeasy kit, according to manufacturer's protocol  
404 and 4 µg of RNA was reverse transcribed to cDNA using Revert Aid reverse transcriptase  
405 (Thermo-Scientific, USA). Real-time PCR was performed using SYBR® Premix Ex Taq™

406 (Tli RNaseH Plus) on a CFX96 Touch™ Real-Time PCR Detection System (BIO-RAD,  
407 USA). Three housekeeping genes Glyceraldehyde 3-phosphate dehydrogenase (*Gapdh*),  
408 TATA box binding protein (*Tbp*) and  $\beta$ -actin (*Actb*) were used for internal normalization  
409 controls. Since all three genes showed equivalent results, *Gapdh* was used for subsequent  
410 normalization of the real time PCR data. Data is expressed as  $2^{-\Delta CT}$ . The sequences of  
411 primers used for quantitative real-time PCR were obtained from those validated at the  
412 PrimerBank database and are available on request (54–56).

### 413 **Quantitative real-time PCR amplification of 16S sequences of fecal microbiota**

414 Bacterial DNA was isolated from fecal pellets using the QIAamp® DNA Stool Mini Kit  
415 according to manufacturer's instructions. The abundance of total bacteria and specific  
416 intestinal bacterial phylum, class and species was quantified by real-time PCR analysis by  
417 SYBR® Premix Ex Taq™ (Tli RNaseH Plus) on a StepOnePlus real-time PCR machine  
418 (Applied Biosystems, USA) using 16S primers published earlier (57, 58) . The efficiencies of  
419 each primer were estimated (data not shown) and were found to be > 90%. Relative bacterial  
420 abundance was determined using the  $\Delta\Delta Ct$  method by employing universal primers for 16s  
421 rDNA for normalization (59). The mean of  $\Delta\Delta Ct$  values obtained for each Phyla seen in wild  
422 type mice was calculated, and this value was used to express the fold-change in individual  
423  $\Delta\Delta Ct$  values for wild type and *Gucy2c*<sup>-/-</sup> mice, to obtain the data shown in Fig. 6.

### 424 **Statistical analysis**

425 All data was analysed using GraphPad Prism 7. The pooled results from independent  
426 experiments are depicted as mean  $\pm$  SD. All data was tested for normality distribution by the  
427 Shapiro-Wilk normality test and found to be normally distributed. Statistical significance  
428 among groups of mice were determined using two-way ANOVA, with multiple comparisons,  
429 and FDR by the two-stage linear step-up procedure of Benjamini, Krieger and Yekutieli.

430 Students t-test with 95% confidence interval was used for comparing abundance of  
431 microbiota in fecal samples. Statistical significance between the mice survival curves were  
432 obtained by the Gehan-Breslow-Wilcoxon test. The denoted p values are as follows: \* $p < 0.05$ ,  
433 \*\* $p < 0.01$ , \*\*\* $p < 0.001$ .

#### 434 **Acknowledgements**

435 The authors acknowledge facilities provided by the Central Animal Facility at the Indian  
436 Institute of Science for housing mice. Financial support from the Department of  
437 Biotechnology (DBT), Government of India (SSV) is acknowledged, as well as support  
438 provided to the Division of Biological Sciences in the form of Grant-In-Aid by DBT. SSV is  
439 a JC Bose National Fellow and support from the Department of Science and Technology,  
440 Government of India, is acknowledged. SSV is a recipient of a Royal Society International  
441 Collaboration Award for Research Professors along with Prof. Gad Frankel from Imperial  
442 College London. SSV would like to thank Prof. Gad Frankel and Dr. Avinash R. Shenoy in  
443 the Centre for Molecular Bacteriology and Infection at Imperial College, London, for useful  
444 discussions.

#### 445 **References**

- 446 1. Santos RL, Raffatellu M, Bevins CL, Adams LG, Tukel C, Tsolis RM, Baumler AJ.  
447 2009. Life in the inflamed intestine, Salmonella style. Trends Microbiol 17:498–506.
- 448 2. Hapfelmeier S, Hardt WD. 2005. A mouse model for *S. typhimurium*-induced  
449 enterocolitis. Trends Microbiol 13:497–503.
- 450 3. Stecher B, Paesold G, Barthel M, Kremer M, Jantsch J, Stallmach T, Heikenwalder M,  
451 Hardt WD. 2006. Chronic *Salmonella enterica* serovar Typhimurium-induced colitis  
452 and cholangitis in streptomycin-pretreated *Nramp1*<sup>+/+</sup> mice. Infect Immun 74:5047–

453 5057.

454 4. Bao S, Beagley KW, France MP, Shen J, Husband AJ. 2000. Interferon-gamma plays a  
455 critical role in intestinal immunity against *Salmonella typhimurium* infection.  
456 *Immunology* 99:464–472.

457 5. Arnold JW, Niesel DW, Annable CR, Hess CB, Asuncion M, Cho YJ, Peterson JW,  
458 Klimpel GR. 1993. Tumor necrosis factor-alpha mediates the early pathology in  
459 *Salmonella* infection of the gastrointestinal tract. *Microb Pathog* 14:217–227.

460 6. Arnold JW, Klimpel GR, Niesel DW. 1993. Tumor necrosis factor (TNF alpha)  
461 regulates intestinal mucus production during salmonellosis. *Cell Immunol* 151:336–  
462 344.

463 7. Sadik CD, Kim ND, Luster AD. 2011. Neutrophils cascading their way to  
464 inflammation. *Trends Immunol* 32:452–460.

465 8. Zhou D, Galan J. 2001. *Salmonella* entry into host cells: the work in concert of type III  
466 secreted effector proteins. *Microbes Infect* 3:1293–1298.

467 9. Currie MG, Fok KF, Kato J, Moore RJ, Hamra FK, Duffin KL, Smith CE. 1992.  
468 Guanylin: an endogenous activator of intestinal guanylate cyclase. *Proc Natl Acad Sci*  
469 *U S A* 89:947–951.

470 10. Hamra FK, Forte LR, Eber SL, Pidhorodeckyj N V, Krause WJ, Freeman RH, Chin  
471 DT, Tompkins JA, Fok KF, Smith CE, Duffin KL, Siegel N, Currie MG. 1993.  
472 Uroguanylin: structure and activity of a second endogenous peptide that stimulates  
473 intestinal guanylate cyclase. *Proc Natl Acad Sci U S A* 90:10464–10468.

474 11. Basu N, Arshad N, Visweswariah SS. 2010. Receptor guanylyl cyclase C (GC-C):

- 475 Regulation and signal transduction. *Mol Cell Biochem* 334.
- 476 12. Schulz S, Green CK, Yuen PS, Garbers DL. 1990. Guanylyl cyclase is a heat-stable  
477 enterotoxin receptor. *Cell* 63:941–948.
- 478 13. Schulz S, Lopez MJ, Kuhn M, Garbers DL. 1997. Disruption of the guanylyl cyclase-C  
479 gene leads to a paradoxical phenotype of viable but heat-stable enterotoxin-resistant  
480 mice. *J Clin Invest* 100:1590–1595.
- 481 14. Lin JE, Snook AE, Li P, Stoecker BA, Kim GW, Magee MS, Garcia A V, Valentino  
482 MA, Hyslop T, Schulz S, Waldman SA. 2012. GUCY2C opposes systemic genotoxic  
483 tumorigenesis by regulating AKT-dependent intestinal barrier integrity. *PLoS One*  
484 7:e31686.
- 485 15. Basu N, Saha S, Khan I, Ramachandra SG, Visweswariah SS. 2014. Intestinal cell  
486 proliferation and senescence are regulated by receptor guanylyl cyclase C and p21. *J*  
487 *Biol Chem* 289.
- 488 16. Mann EA, Harmel-Laws E, Cohen MB, Steinbrecher KA. 2013. Guanylate cyclase C  
489 limits systemic dissemination of a murine enteric pathogen. *BMC Gastroenterol*  
490 13:135.
- 491 17. Barthel M, Hapfelmeier S, Quintanilla-Martinez L, Kremer M, Rohde M, Hogardt M,  
492 Pfeffer K, Russmann H, Hardt WD. 2003. Pretreatment of mice with streptomycin  
493 provides a *Salmonella enterica* serovar Typhimurium colitis model that allows analysis  
494 of both pathogen and host. *Infect Immun* 71:2839–2858.
- 495 18. Sekirov I, Tam NM, Jogova M, Robertson ML, Li Y, Lupp C, Finlay BB. 2008.  
496 Antibiotic-induced perturbations of the intestinal microbiota alter host susceptibility to  
497 enteric infection. *Infect Immun* 76:4726–4736.

- 498 19. Ren Z, Gay R, Thomas A, Pae M, Wu D, Logsdon L, Mecsas J, Meydani SN. 2009.  
499 Effect of age on susceptibility to *Salmonella* Typhimurium infection in C57BL/6 mice.  
500 *J Med Microbiol* 58:1559–1567.
- 501 20. Deobagkar-Lele M, Chacko SK, Victor ES, Kadthur JC, Nandi D. 2013. Interferon-  
502 gamma- and glucocorticoid-mediated pathways synergize to enhance death of CD4(+)  
503 CD8(+) thymocytes during *Salmonella enterica* serovar Typhimurium infection.  
504 *Immunology* 138:307–321.
- 505 21. Majumdar S, Deobagkar-Lele M, Adiga V, Raghavan A, Wadhwa N, Ahmed SM,  
506 Rananaware SR, Chakraborty S, Joy O, Nandi D. 2017. Differential susceptibility and  
507 maturation of thymocyte subsets during *Salmonella* Typhimurium infection: insights  
508 on the roles of glucocorticoids and Interferon-gamma. *Sci Rep* 7:40793.
- 509 22. Ikpa PT, Sleddens HF, Steinbrecher KA, Peppelenbosch MP, de Jonge HR, Smits R,  
510 Bijvelds MJ. 2016. Guanylin and uroguanylin are produced by mouse intestinal  
511 epithelial cells of columnar and secretory lineage. *Histochem Cell Biol* 146:445–455.
- 512 23. Arshad N, Visweswariah SS. 2012. The multiple and enigmatic roles of guanylyl  
513 cyclase C in intestinal homeostasis. *FEBS Lett* 586.
- 514 24. LaRock DL, Chaudhary A, Miller SI. 2015. *Salmonellae* interactions with host  
515 processes. *Nat Rev Microbiol* 13:191–205.
- 516 25. Nakazato G, Paganelli FL, Lago JC, Aoki FH, Mobilon C, Brocchi M, Stehling EG,  
517 Silveira WD. 2011. *Lactobacillus acidophilus* decreases *Salmonella* Typhimurium  
518 invasion in vivo. *J Food Saf* 31:284–289.
- 519 26. Huang IF, Lin IC, Liu PF, Cheng MF, Liu YC, Hsieh YD, Chen JJ, Chen CL, Chang  
520 HW, Shu CW. 2015. *Lactobacillus acidophilus* attenuates *Salmonella*-induced

- 521 intestinal inflammation via TGF-beta signaling. BMC Microbiol 15:203.
- 522 27. Abdel-Daim A, Hassouna N, Hafez M, Ashor MS, Aboulwafa MM. 2013.  
523 Antagonistic activity of Lactobacillus isolates against Salmonella typhi in vitro.  
524 Biomed Res Int 2013:680605.
- 525 28. Coconnier MH, Lievin V, Lorrot M, Servin AL. 2000. Antagonistic activity of  
526 Lactobacillus acidophilus LB against intracellular Salmonella enterica serovar  
527 Typhimurium infecting human enterocyte-like Caco-2/TC-7 cells. Appl Env Microbiol  
528 66:1152–1157.
- 529 29. Nicolaides NC, Kyrtzi E, Lamprokostopoulou A, Chrousos GP, Charmandari E.  
530 2015. Stress, the stress system and the role of glucocorticoids.  
531 Neuroimmunomodulation 22:6–19.
- 532 30. Tannock GW, Blumersine R V, Savage DC. 1975. Association of Salmonella  
533 typhimurium with, and its invasion of, the ileal mucosa in mice. Infect Immun 11:365–  
534 370.
- 535 31. Stecher B, Macpherson AJ, Hapfelmeier S, Kremer M, Stallmach T, Hardt WD. 2005.  
536 Comparison of Salmonella enterica serovar Typhimurium colitis in germfree mice and  
537 mice pretreated with streptomycin. Infect Immun 73:3228–3241.
- 538 32. Caprilli R. 2008. Why does Crohn’s disease usually occur in terminal ileum? J Crohn’s  
539 Colitis 2:352–356.
- 540 33. Cominelli F, Arseneau KO, Rodriguez-Palacios A, Pizarro TT. 2017. Uncovering  
541 Pathogenic Mechanisms of Inflammatory Bowel Disease Using Mouse Models of  
542 Crohn’s Disease-Like Ileitis: What is the Right Model? Cell Mol Gastroenterol  
543 Hepatol 4:19–32.

- 544 34. He P, Yun CC. 2010. Mechanisms of the regulation of the intestinal Na<sup>+</sup>/H<sup>+</sup>  
545 exchanger NHE3. *J Biomed Biotechnol* 2010:238080.
- 546 35. Lan D, Niu J, Miao J, Dong X, Wang H, Yang G, Wang K, Miao Y. 2016. Expression  
547 of guanylate cyclase-C, guanylin, and uroguanylin is downregulated proportionally to  
548 the ulcerative colitis disease activity index. *Sci Rep* 6.
- 549 36. Brenna Ø, Bruland T, Furnes MW, Granlund AVB, Drozdov I, Emgård J, Brønstad G,  
550 Kidd M, Sandvik AK, Gustafsson BI. 2015. The guanylate cyclase-C signaling  
551 pathway is down-regulated in inflammatory bowel disease. *Scand J Gastroenterol*  
552 50:1241–1252.
- 553 37. Pattison AM, Merlino DJ, Blomain ES, Waldman SA. 2016. Guanylyl cyclase C  
554 signaling axis and colon cancer prevention. *World J Gastroenterol* 22:8070–8077.
- 555 38. Nakano Y, Onozuka K, Terada Y, Shinomiya H, Nakano M. 1990. Protective effect of  
556 recombinant tumor necrosis factor-alpha in murine salmonellosis. *J Immunol*  
557 144:1935–1941.
- 558 39. Tracey KJ, Beutler B, Lowry SF, Merryweather J, Wolpe S, Milsark IW, Hariri RJ,  
559 Fahey 3rd TJ, Zentella A, Albert JD, Shires G, Cerami A. 1986. Shock and tissue  
560 injury induced by recombinant human cachectin. *Science* 234:470–474.
- 561 40. Beutler B, Grau GE. 1993. Tumor necrosis factor in the pathogenesis of infectious  
562 diseases. *Crit Care Med* 21:S423-35.
- 563 41. Zheng Y, Danilenko DM, Valdez P, Kasman I, Eastham-Anderson J, Wu J, Ouyang  
564 W. 2007. Interleukin-22, a T(H)17 cytokine, mediates IL-23-induced dermal  
565 inflammation and acanthosis. *Nature* 445:648–651.



- 566 42. Powell N, Lo JW, Biancheri P, Vossenkamper A, Pantazi E, Walker AW, Stolarczyk  
567 E, Ammoscato F, Goldberg R, Scott P, Canavan JB, Perucha E, Garrido-Mesa N,  
568 Irving PM, Sanderson JD, Hayee B, Howard JK, Parkhill J, MacDonald TT, Lord GM.  
569 2015. Interleukin 6 Increases Production of Cytokines by Colonic Innate Lymphoid  
570 Cells in Mice and Patients With Chronic Intestinal Inflammation. *Gastroenterology*  
571 149:456–67 e15.
- 572 43. Vaishnava S, Yamamoto M, Severson KM, Ruhn KA, Yu X, Koren O, Ley R,  
573 Wakeland EK, Hooper L V. 2011. The antibacterial lectin RegIII $\gamma$  promotes the  
574 spatial segregation of microbiota and host in the intestine. *Science* (80- ) 334:255–258.
- 575 44. Behnsen J, Jellbauer S, Wong CP, Edwards RA, George MD, Ouyang W, Raffatellu  
576 M. 2014. The cytokine IL-22 promotes pathogen colonization by suppressing related  
577 commensal bacteria. *Immunity* 40:262–273.
- 578 45. van Ampting MTJ, Loonen LMP, Schonewille AJ, Konings I, Vink C, Iovanna J,  
579 Chamaillard M, Dekker J, van der Meer R, Wells JM. 2012. Intestinally secreted C-  
580 type lectin Reg3b attenuates salmonellosis but not listeriosis in mice. *Infect Immun*  
581 80:1115–1120.
- 582 46. Loonen LM, Stolte EH, Jaklofsky MT, Meijerink M, Dekker J, van Baarlen P, Wells  
583 JM. 2014. REG3 $\gamma$ -deficient mice have altered mucus distribution and increased  
584 mucosal inflammatory responses to the microbiota and enteric pathogens in the ileum.  
585 *Mucosal Immunol* 7:939–947.
- 586 47. Lindemans CA, Calafiore M, Mertelsmann AM, O'Connor MH, Dudakov JA, Jenq  
587 RR, Velardi E, Young LF, Smith OM, Lawrence G, Ivanov JA, Fu YY, Takashima S,  
588 Hua G, Martin ML, O'Rourke KP, Lo YH, Mokry M, Romera-Hernandez M, Cupedo

- 589 T, Dow LE, Nieuwenhuis EE, Shroyer NF, Liu C, Kolesnick R, Van Den Brink MRM,  
590 Hanash AM. 2015. Interleukin-22 promotes intestinal-stem-cell-mediated epithelial  
591 regeneration. *Nature* 528:560–564.
- 592 48. Murray IA, Perdew GH. 2016. Ligand activation of the Ah receptor contributes to  
593 gastrointestinal homeostasis. *Curr Opin Toxicol*.
- 594 49. Zelante T, Iannitti RG, Cunha C, DeLuca A, Giovannini G, Pieraccini G, Zecchi R,  
595 D’Angelo C, Massi-Benedetti C, Fallarino F, Carvalho A, Puccetti P, Romani L. 2013.  
596 Tryptophan catabolites from microbiota engage aryl hydrocarbon receptor and balance  
597 mucosal reactivity via interleukin-22. *Immunity* 39:372–385.
- 598 50. Bäumlér AJ, Sperandio V. 2016. Interactions between the microbiota and pathogenic  
599 bacteria in the gut. *Nature* 535:85–93.
- 600 51. Larmonier CB, Laubitz D, Hill FM, Shehab KW, Lipinski L, Midura-Kiela MT,  
601 McFadden RM, Ramalingam R, Hassan KA, Golebiewski M, Besselsen DG, Ghishan  
602 FK, Kiela PR. 2013. Reduced colonic microbial diversity is associated with colitis in  
603 NHE3-deficient mice. *Am J Physiol Gastrointest Liver Physiol* 305:G667-77.
- 604 52. Norkina O, Burnett TG, De Lisle RC. 2004. Bacterial overgrowth in the cystic fibrosis  
605 transmembrane conductance regulator null mouse small intestine. *Infect Immun*  
606 72:6040–6049.
- 607 53. Castro J, Harrington AM, Hughes PA, Martin CM, Ge P, Shea CM, Jin H, Jacobson S,  
608 Hannig G, Mann E, Cohen MB, MacDougall JE, Lavins BJ, Kurtz CB, Silos-Santiago  
609 I, Johnston JM, Currie MG, Blackshaw LA, Brierley SM. 2013. Linaclotide inhibits  
610 colonic nociceptors and relieves abdominal pain via guanylate cyclase-C and  
611 extracellular cyclic guanosine 3’,5’-monophosphate. *Gastroenterology* 145:1311–

- 612 1334.
- 613 54. Wang X, Seed B. 2003. A PCR primer bank for quantitative gene expression analysis.  
614 Nucleic Acids Res 31:e154.
- 615 55. Spandidos A, Wang X, Wang H, Dragnev S, Thurber T, Seed B. 2008. A  
616 comprehensive collection of experimentally validated primers for Polymerase Chain  
617 Reaction quantitation of murine transcript abundance. BMC Genomics 9:633.
- 618 56. Spandidos A, Wang X, Wang H, Seed B. 2010. PrimerBank: a resource of human and  
619 mouse PCR primer pairs for gene expression detection and quantification. Nucleic  
620 Acids Res 38:D792-9.
- 621 57. Yang Y-W, Chen M-K, Yang B-Y, Huang X-J, Zhang X-R, He L-Q, Zhang J, Hua Z-  
622 C. 2015. Use of 16S rRNA gene-targeted group-specific primers for real-time PCR  
623 analysis of predominant bacteria in mouse feces. Appl Environ Microbiol 81:6749–  
624 6756.
- 625 58. Clifford RJ, Milillo M, Prestwood J, Quintero R, Zurawski D V, Kwak YI, Waterman  
626 PE, Lesho EP, Mc Gann P. 2012. Detection of bacterial 16S rRNA and identification  
627 of four clinically important bacteria by real-time PCR. PLoS One 7:e48558.
- 628 59. Feng Y, Gong J, Yu H, Jin Y, Zhu J, Han Y. 2010. Identification of changes in the  
629 composition of ileal bacterial microbiota of broiler chickens infected with *Clostridium*  
630 *perfringens*. Vet Microbiol 140:116–121.

631

632 **Legends to Figures**

633 **Figure 1: *Gucy2c*<sup>-/-</sup> mice display accelerated mortality during oral infection with *S.***

634 ***Typhimurium*.** (a) *Gucy2c*<sup>+/+</sup> and *Gucy2c*<sup>-/-</sup> mice were infected with *S. Typhimurium* either

635 orally or intra-peritoneally. The mice were monitored for survival at 8 h intervals. Survival

636 curves for oral and intra-peritoneal infection were obtained from independent experiments

637 containing a total of 10-11 mice. (b) Mice (*Gucy2c*<sup>+/+</sup>, black circles; *Gucy2c*<sup>-/-</sup>, grey circles)

638 were orally infected with *S. Typhimurium* and the bacterial load in the feces on day 1 and 2

639 following infection were estimated. Data show values for individual mice, with error bars

640 showing the mean  $\pm$  SD. (c) Infected mice were sacrificed on day 3, tissues harvested and

641 bacterial burden in the spleen, Peyer's patches and liver was estimated. Data show values for

642 individual mice, with error bars showing the mean  $\pm$  SD. (d) Mice were weighed prior to oral

643 infection and 3 days post infection. (e) Serum was collected from uninfected and infected

644 mice and levels of TNF- $\alpha$ , IFN- $\gamma$  and IL-6 were measured by ELISA. In panels b-e, the data

645 are depicted as mean  $\pm$  SD of 3-7 mice per group. Statistical significance among the

646 experimental groups in all panels was analysed using two-way ANOVA, \* $p \leq 0.05$  and ns: not

647 significant.

648

649 **Figure 2. Early rise in serum cortisol amounts and increased infection-induced thymic**

650 **atrophy is observed in *Gucy2c*<sup>-/-</sup> mice.** (a) *Gucy2c*<sup>+/+</sup> and *Gucy2c*<sup>-/-</sup> mice were orally

651 infected with *S. Typhimurium*. At the indicated time points, uninfected (-St) and infected

652 (+St) mice were sacrificed and serum cortisol levels were measured by ELISA. Data show

653 values for individual mice, with error bars showing the mean  $\pm$  SD. (b) Viable cells from

654 harvested thymi were quantified by Trypan blue exclusion assay using a haemocytometer. (c)

655 The thymocytes from uninfected (-St) and mice post 96 h of infection (+St) were stained for

656 cell surface expression of CD4 and CD8 and the density plots were constructed to quantify  
657 the percentages of the major cell populations. Data are depicted as mean  $\pm$  SEM of 5-8 mice  
658 per group. In all panels, experimental groups were analysed for statistical significance using  
659 two-way ANOVA,  $*p \leq 0.05$ ,  $***p \leq 0.001$  and  $****p \leq 0.0001$ . Green bars indicate  
660 differences that were statistically significant between *Gucy2c*<sup>+/+</sup> (black circles) and *Gucy2c*<sup>-/-</sup>  
661 (grey circles) mice.

662

663 **Figure 3: *Gucy2c*<sup>-/-</sup> mice show increased bacterial colonization and intestinal damage.**

664 Infected *Gucy2c*<sup>+/+</sup> (black circles) and *Gucy2c*<sup>-/-</sup> (grey circles) mice were sacrificed 3 days  
665 post oral *S. Typhimurium* infection. (a) Bacterial load in the ileum, cecum and colon was  
666 estimated. Values represent individual mice, and lines show the mean  $\pm$  SD. (b) Periodic  
667 Acid Schiff (PAS) staining was performed on formalin fixed ileal tissue sections obtained  
668 from uninfected (-St) and infected (+St) on day 3 and 4 following infection. One  
669 representative ileal tissue section from each experimental group containing 3-4 mice is  
670 depicted, and the scale bars measure 100  $\mu$ m. Arrow shows a large number of apoptic cells in  
671 the lumen of *Gucy2c*<sup>-/-</sup> mice. (c) The number of goblet cells was quantified in individual,  
672 clearly identifiable, villi in each section from uninfected (-St; black circles) and infected  
673 (+St; red circles) mice. Data shown is from individual villi across a section, and lines indicate  
674 the mean  $\pm$  SD. Statistical analysis was performed by two-way ANOVA and  $*p \leq 0.05$ .

675

676 **Figure 4. *S. Typhimurium* infection regulates expression of genes in the GC-C signaling**

677 **pathway.** RNA was prepared from ileal tissue of uninfected (-St) and infected (+St) mice on  
678 day 3 following oral infection. Quantitative real-time PCR analysis was performed to  
679 estimate the transcript levels of *Gucy2c*, *Guca2a*, *Guca2b*, *PkgII*, *Pde5*, *Nhe3* and *Cftr*. The

680 data are depicted as values for individual mice, and lines represent the mean  $\pm$  SD. Two-way  
681 ANOVA was used to analyse for statistical significance among the experimental groups,  $*p \leq$   
682 0.05,  $**p \leq 0.01$ ,  $***p \leq 0.001$  and ns: not significant.

683

684 **Figure 5. *Gucy2c*<sup>-/-</sup> mice show reduced transcript levels of IL-23/IL-22 in the ileum**  
685 **following infection.** Orally infected *Gucy2c*<sup>+/+</sup> and *Gucy2c*<sup>-/-</sup> mice were sacrificed 3 days  
686 post infection (+St) along with the control uninfected mice (-St). RNA was isolated from the  
687 harvested ileal tissues and quantitative real-time PCR analysis was performed to estimate the  
688 transcript levels of *Tnf- $\alpha$* , *Il-1b*, *Il-6*, *Cxcl-15*, *Il-22*, *Il-23*, *Ifn- $\gamma$* , *Il-4*, *Cxcl-1*, *Cxcl-2*, *Cxcl-9*,  
689 *Cxcl-10*, *Lcn 2*, *Reg3 $\beta$*  and *Reg3 $\gamma$* . The data shown are from individual mice and lines depict  
690 the mean  $\pm$  SD. The experimental groups were analysed for statistical significance using two-  
691 way ANOVA,  $*p \leq 0.05$ ,  $**p \leq 0.01$ ,  $***p \leq 0.001$  and ns: not significant. Green bars  
692 represent values which differed significantly between *Gucy2c*<sup>+/+</sup> and *Gucy2c*<sup>-/-</sup> mice.

693

694 **Figure 6. Abundance of major microbial phyla in *Gucy2c*<sup>+/+</sup> and *Gucy2c*<sup>-/-</sup> mice.** (a) Fecal  
695 pellets from uninfected *Gucy2c*<sup>+/+</sup> and *Gucy2c*<sup>-/-</sup> mice, and *Gucy2c*<sup>-/-</sup> mice co-housed with  
696 wild type mice, were collected and the bacterial DNA was isolated from the samples.  
697 Quantitative real-time PCR was performed to analyse levels of gut microbiota using Phyla  
698 specific primers, normalized to universal 16S primers. Values shown represent individual  
699 mice and lines show the mean  $\pm$  SD. Statistical analysis was performed using non-parametric  
700 Mann-Whitney *U* test,  $**p \leq 0.01$ . (b) *Gucy2c*<sup>+/+</sup> and co-housed *Gucy2c*<sup>-/-</sup> (4 each) were  
701 infected with St and housed together in multiple cages during the course of infection.  
702 Survival of mice was checked every 8h. (c) Fecal pellets from individual mice were collected  
703 24 h and 48 h following infection of mice (*Gucy2c*<sup>+/+</sup>, black circles; *Gucy2c*<sup>-/-</sup>, grey circles)

704 and the bacterial load in the feces on day 1 and 2 following infection were estimated. Data  
705 show values for individual mice, with error bars showing the mean  $\pm$  SD. (c) Individual mice  
706 were weighted prior to infection and then every day following infection till day 3 (when  
707 *Gucy2c*<sup>-/-</sup> mice had started to succumb to infection). Data shown is the mean  $\pm$  SD (n=4).

708 **Figure 7. Putative role of GC-C during Salmonella infection.** The IL23/IL22 arm of the  
709 innate immune response during *Salmonella* infection is regulated by GC-C. Post oral  
710 infection in mice, *Salmonella* competes with the commensal *Lactobacillus* to invade the  
711 epithelial and dendritic cells of the gut. *Salmonella* downregulates the expression of the GC-  
712 C receptor and its endogenous ligands, guanylin and uroguanylin. Probable interaction of GC-  
713 C with dendritic cells and macrophages along with IL-6 upregulation leads to induction of IL-  
714 23 expression, which activates the TH17 cells to express the cytokine IL-22, which in turn  
715 induces the expression of the AMP, Reg3 $\beta$ , in epithelial cells.

**a**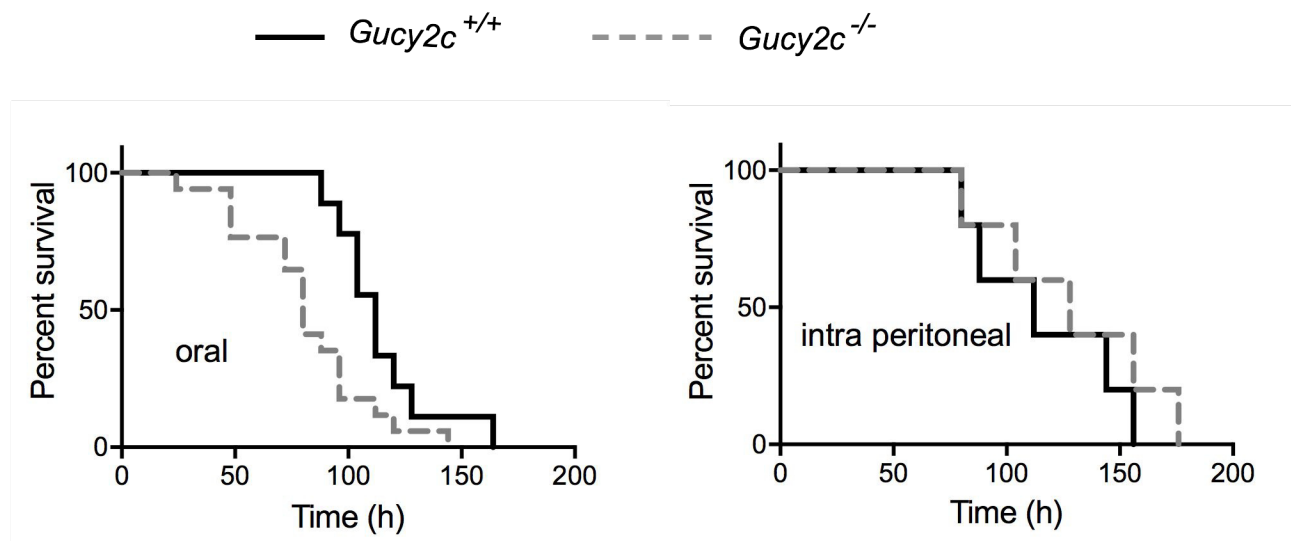**b**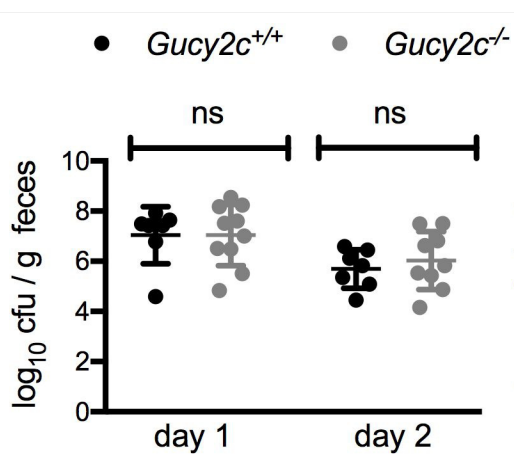**c**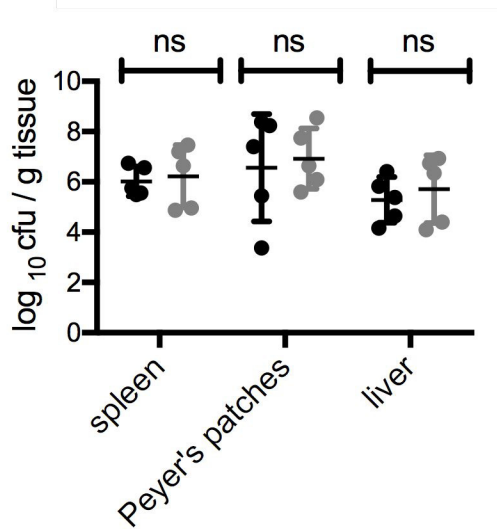**d**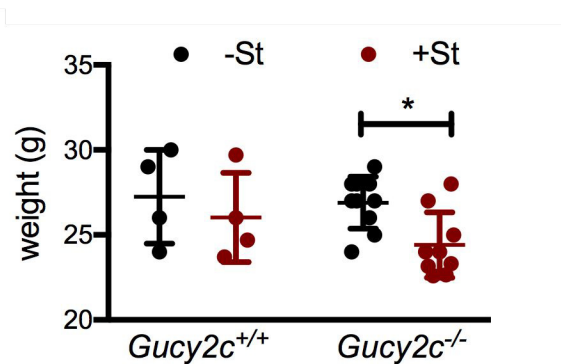**e**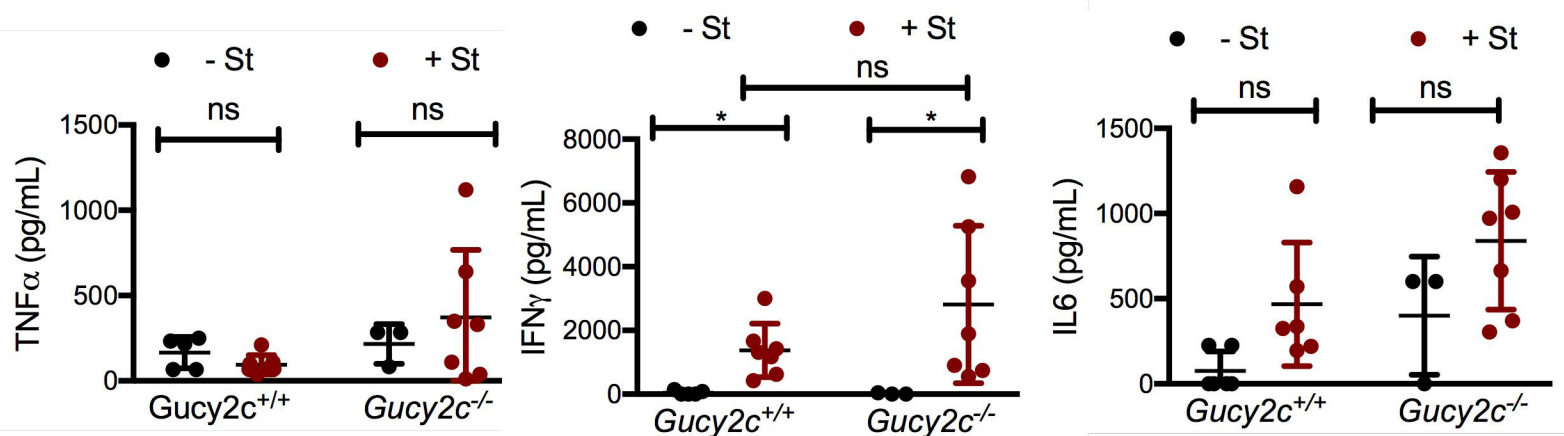

Figure 1



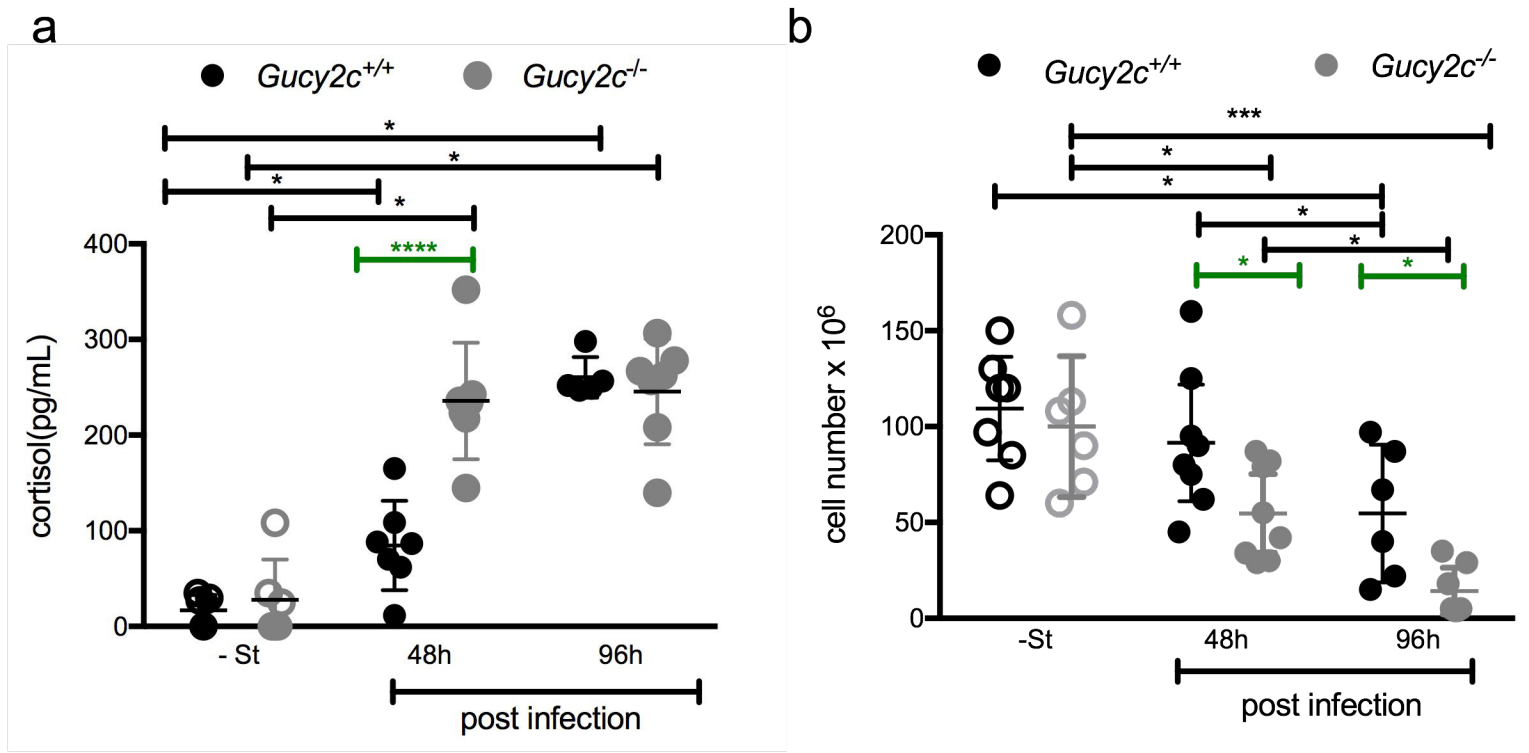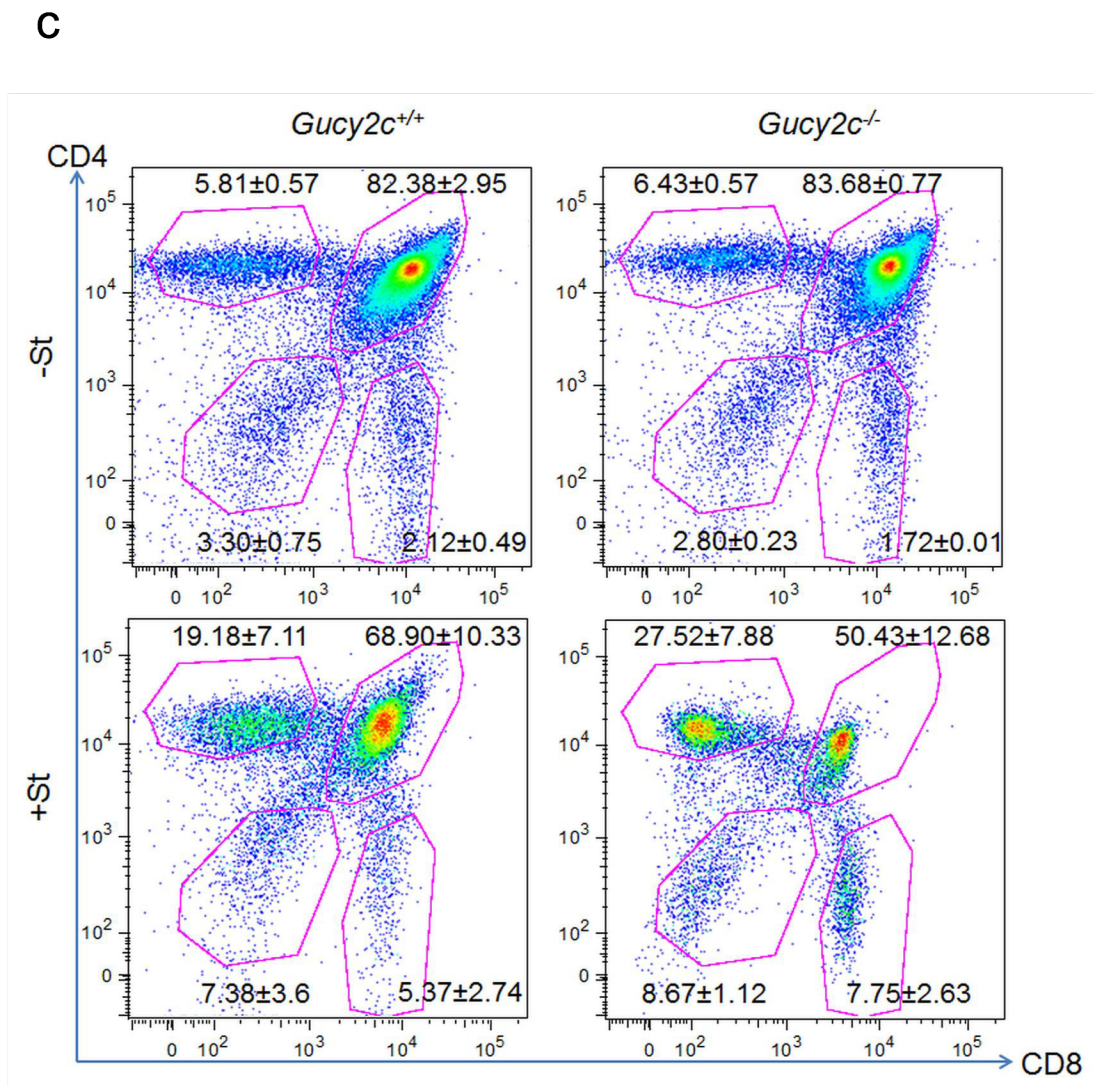

Figure 2

**a**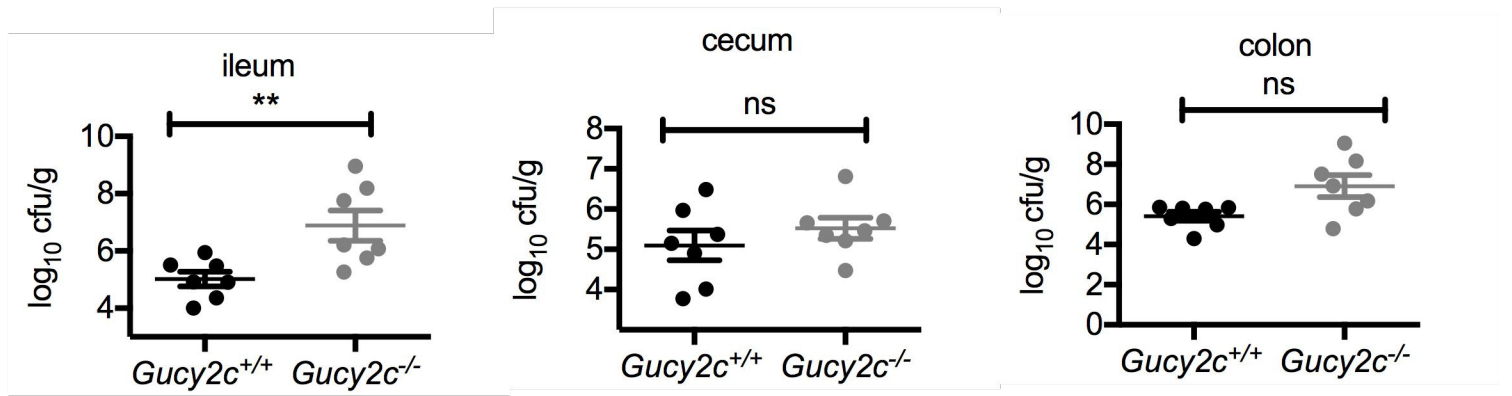**b**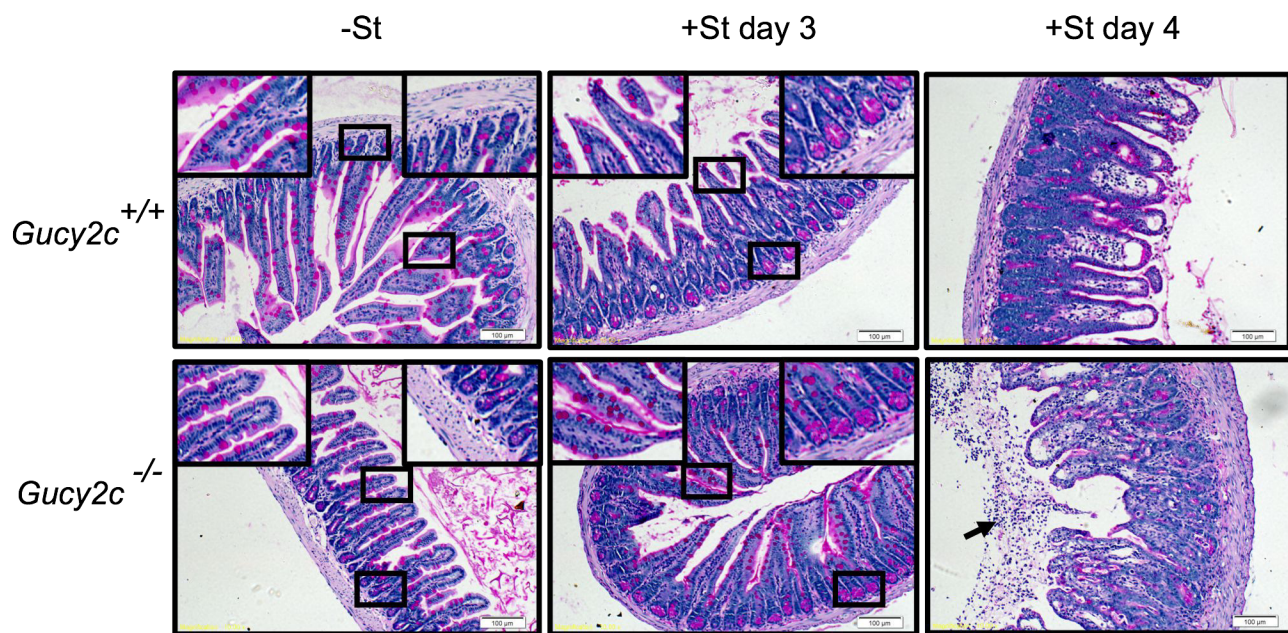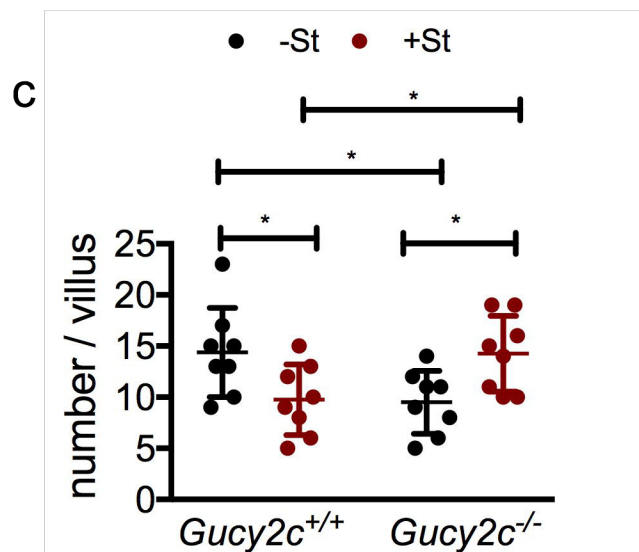

Figure 3

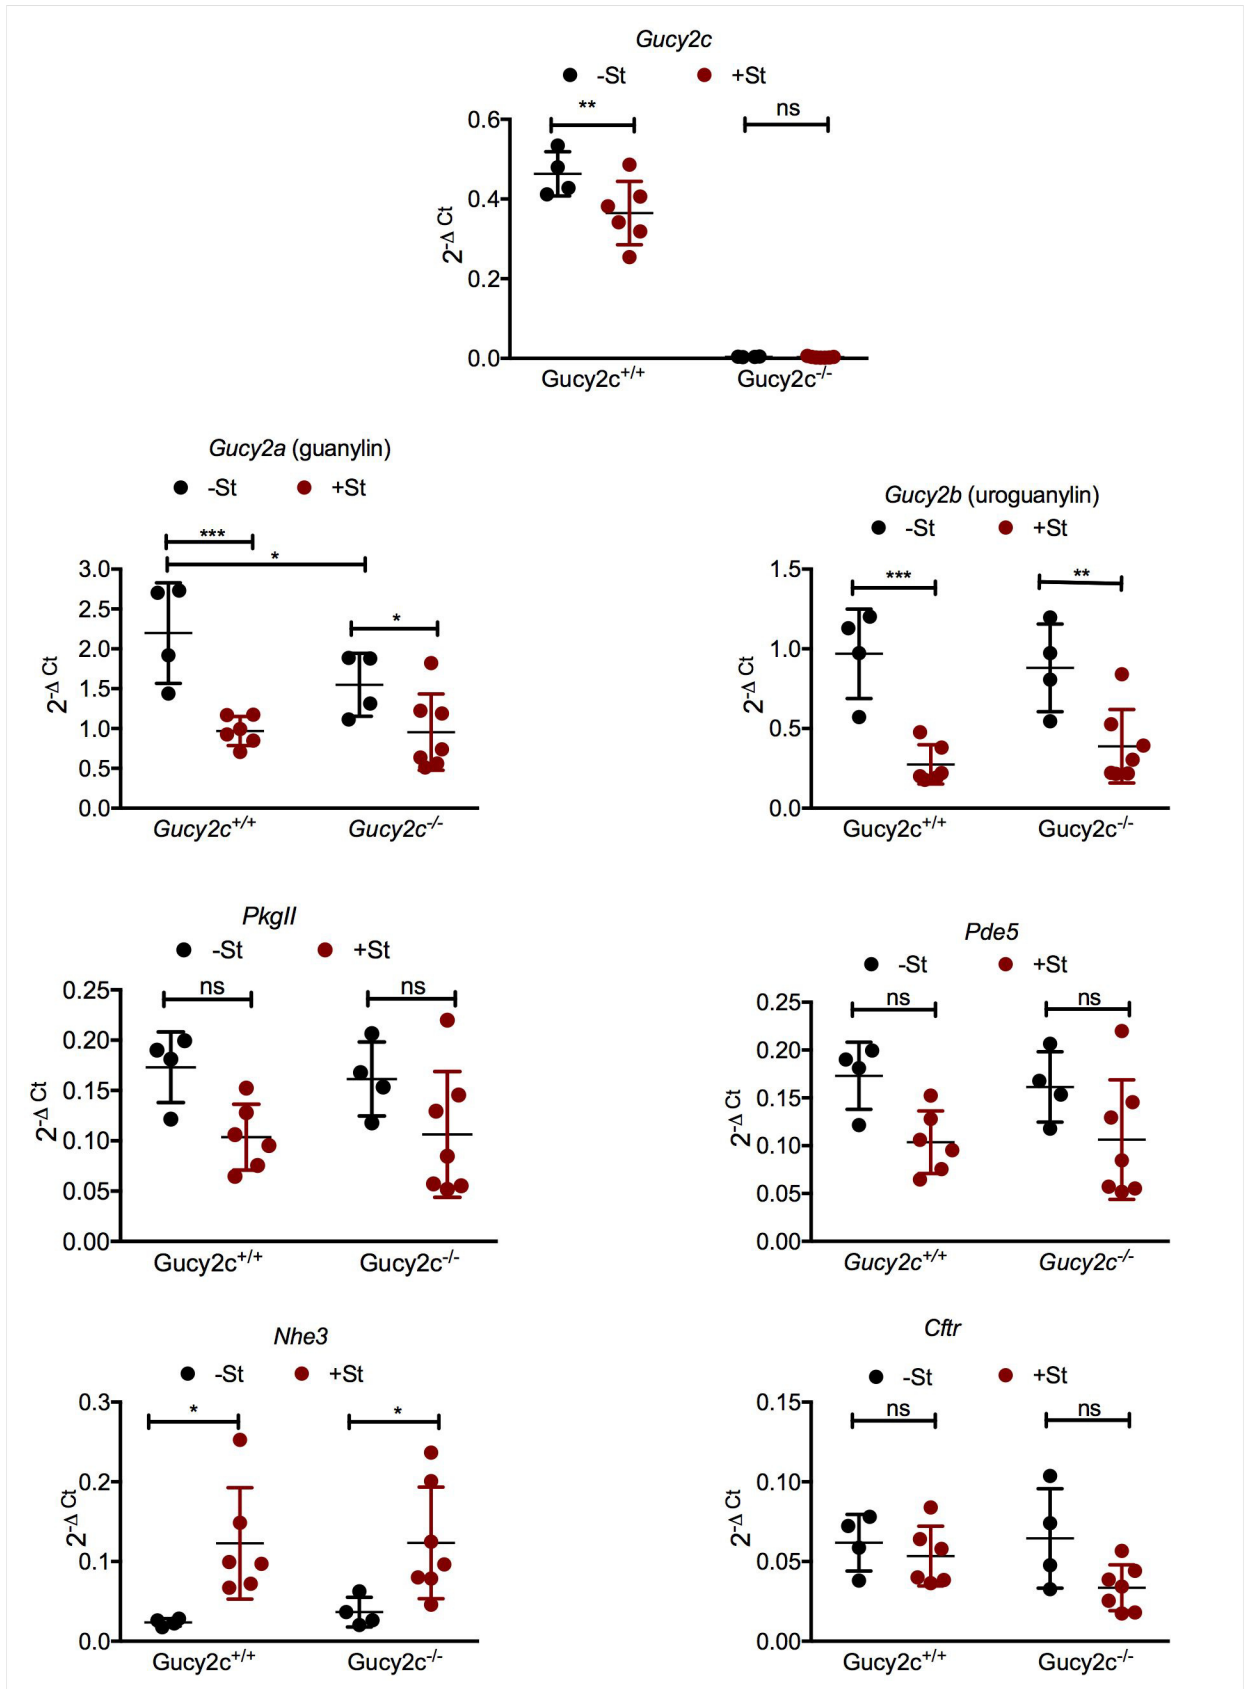

Figure 4

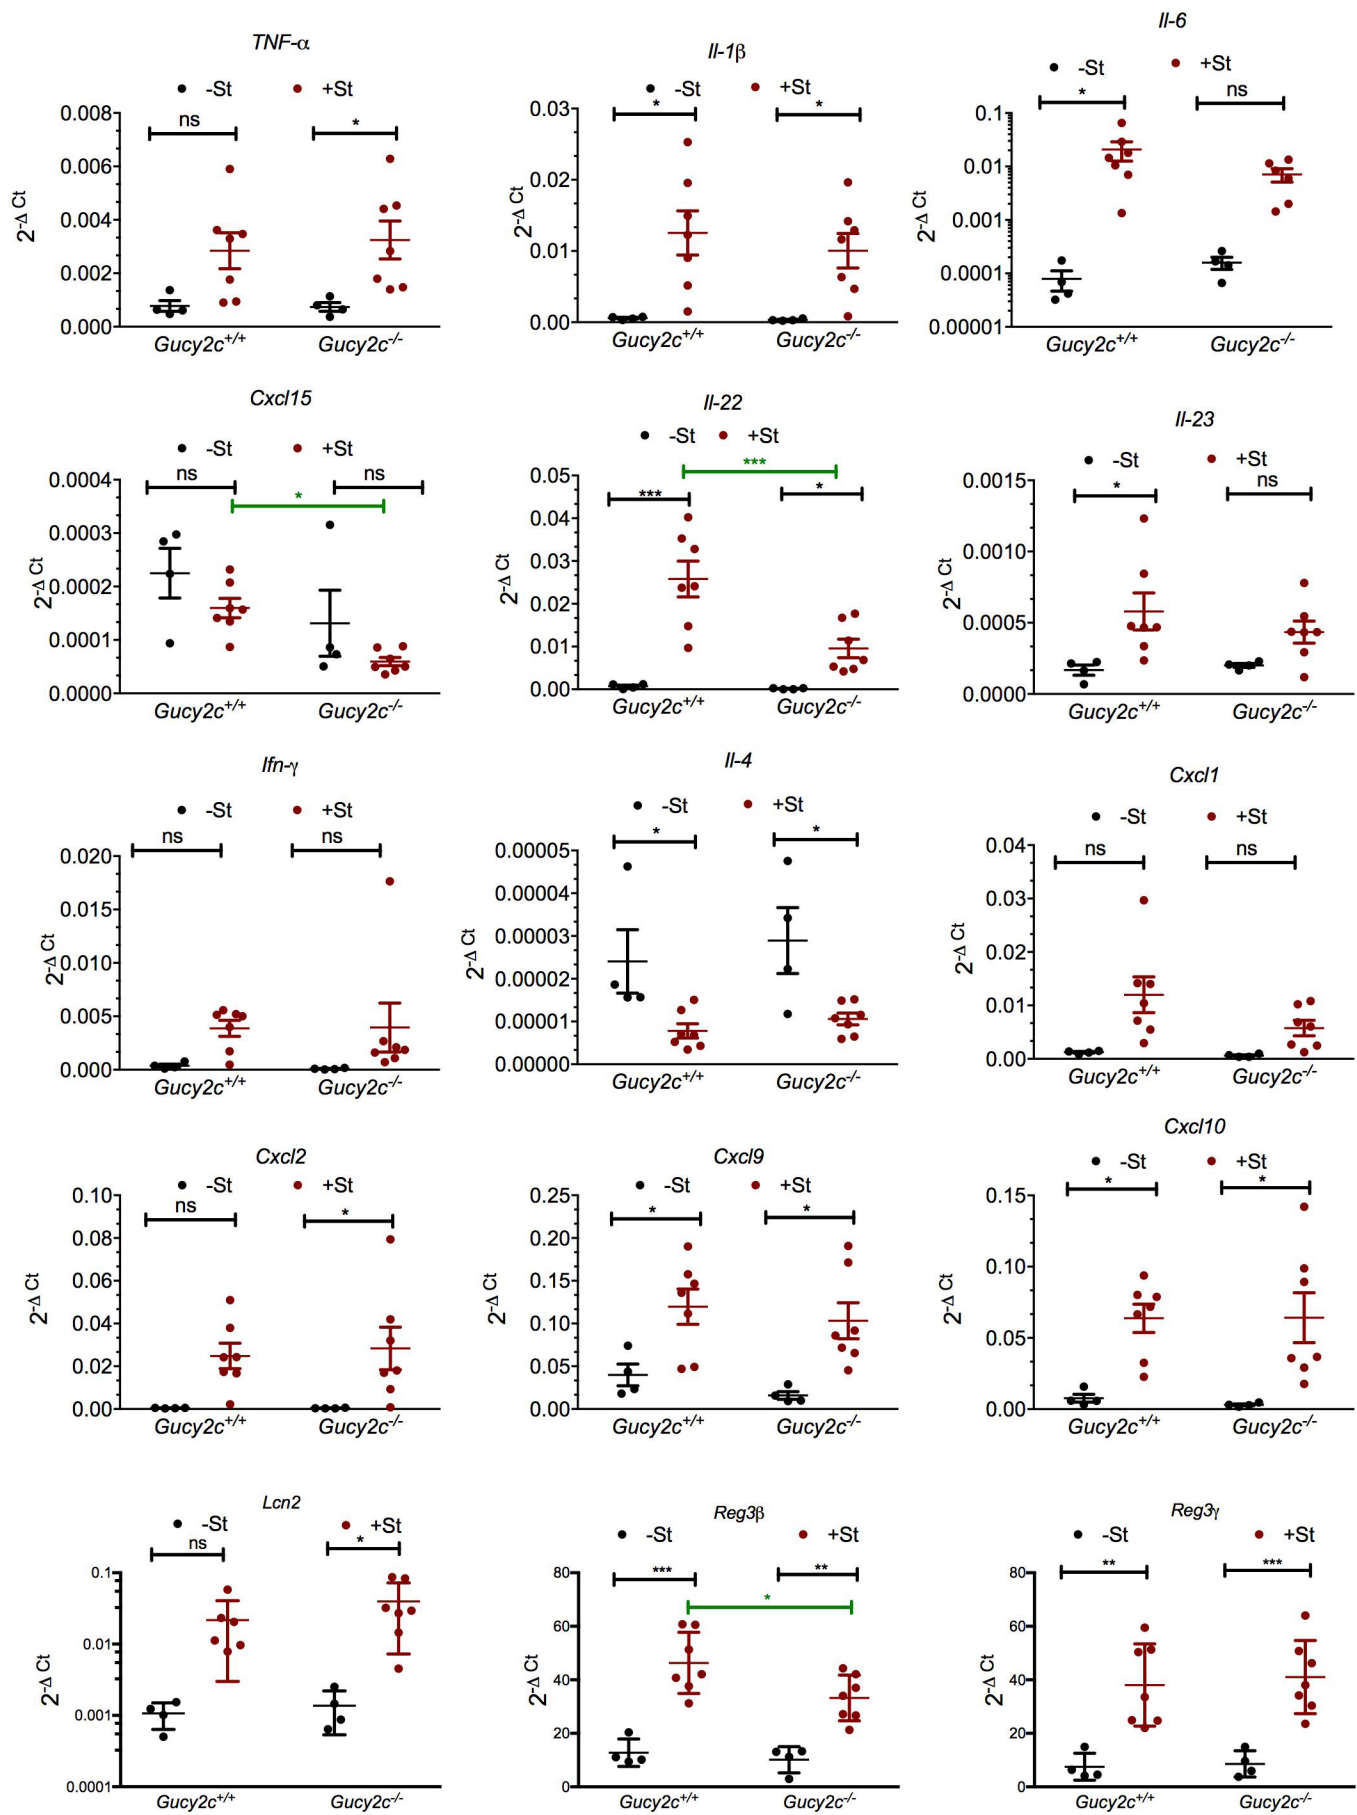

Figure 5

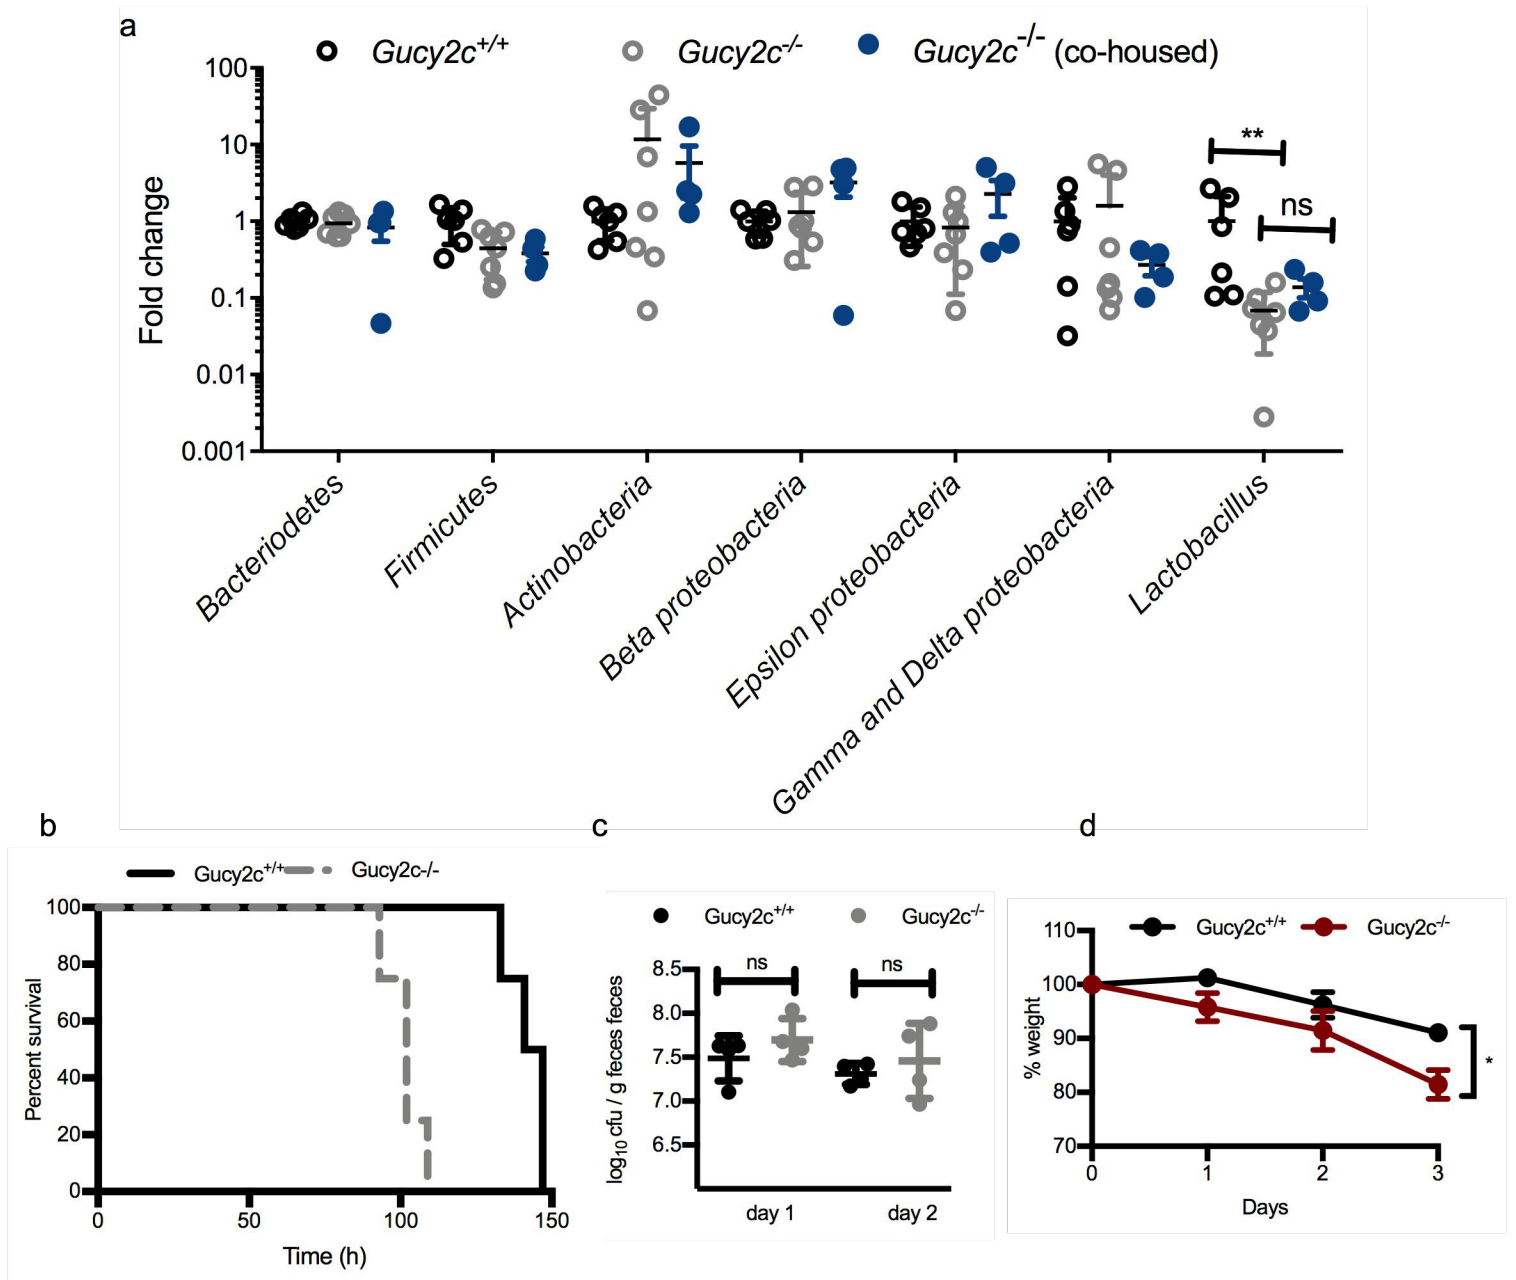

Figure 6

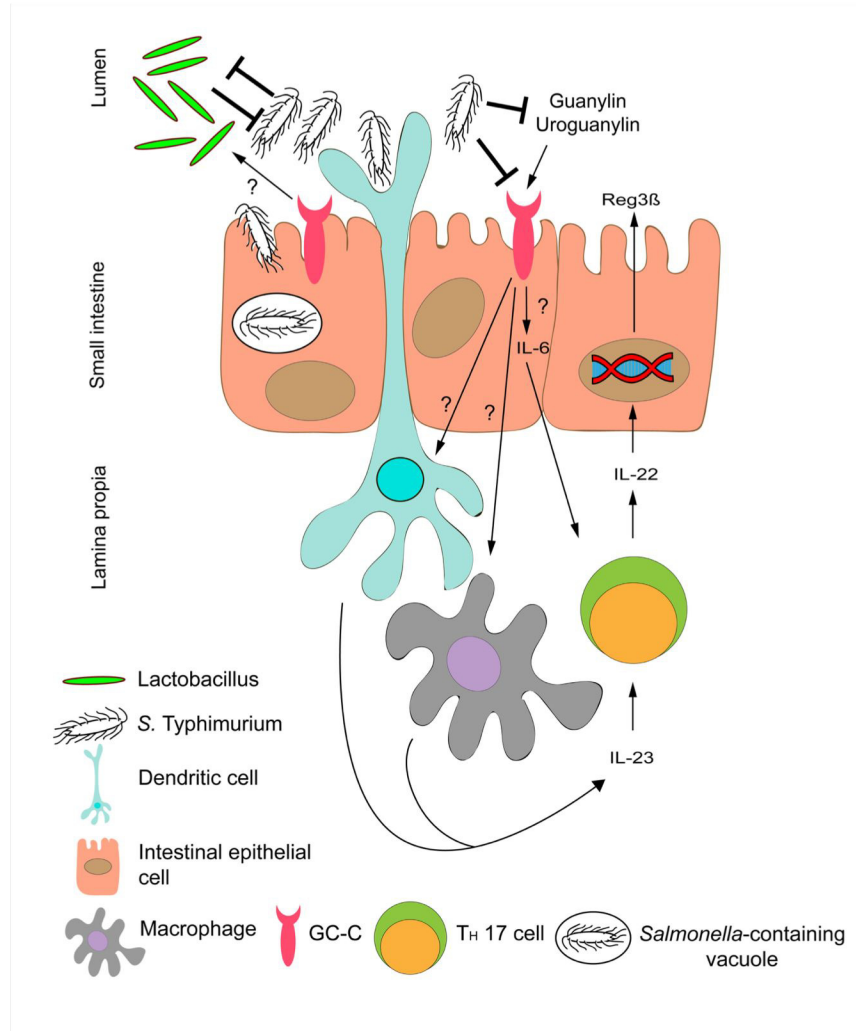

Figure 7
